# Supplementary material for: Impact of social relationships on income–laughter relationships among older people: the JAGES cross-sectional study
Source: PubMed Central journal article supplement — BMJ Open. 2018 Jul 5;8(7):e019104. doi: 10.1136/bmjopen-2017-019104 (PMC6042575; doi:10.1136/bmjopen-2017-019104), 2018-07-05
Supplement: bmjopen-2017-019104.draft_revisions.pdf [file bmjopen-2017-019104.draft_revisions.pdf]

# BMJ Open

BMJ Open is committed to open peer review. As part of this commitment we make the peer review history of every article we publish publicly available.

When an article is published we post the peer reviewers' comments and the authors' responses online. We also post the versions of the paper that were used during peer review. These are the versions that the peer review comments apply to.

The versions of the paper that follow are the versions that were submitted during the peer review process. They are not the versions of record or the final published versions. They should not be cited or distributed as the published version of this manuscript.

BMJ Open is an open access journal and the full, final, typeset and author-corrected version of record of the manuscript is available on our site with no access controls, subscription charges or pay-per-view fees (<http://bmjopen.bmj.com>).

If you have any questions on BMJ Open's open peer review process please email [info.bmjopen@bmj.com](mailto:info.bmjopen@bmj.com)

# BMJ Open

## Laughter associated with income among older Japanese people: The JAGES project cross-sectional study

|                                 |                                                                                                                                                                                                                                                                                                                                                                                                                                                                                                                                                                                                                                                                                                                                                                                                                                                       |
|---------------------------------|-------------------------------------------------------------------------------------------------------------------------------------------------------------------------------------------------------------------------------------------------------------------------------------------------------------------------------------------------------------------------------------------------------------------------------------------------------------------------------------------------------------------------------------------------------------------------------------------------------------------------------------------------------------------------------------------------------------------------------------------------------------------------------------------------------------------------------------------------------|
| Journal:                        | <i>BMJ Open</i>                                                                                                                                                                                                                                                                                                                                                                                                                                                                                                                                                                                                                                                                                                                                                                                                                                       |
| Manuscript ID                   | bmjopen-2017-019104                                                                                                                                                                                                                                                                                                                                                                                                                                                                                                                                                                                                                                                                                                                                                                                                                                   |
| Article Type:                   | Research                                                                                                                                                                                                                                                                                                                                                                                                                                                                                                                                                                                                                                                                                                                                                                                                                                              |
| Date Submitted by the Author:   | 11-Aug-2017                                                                                                                                                                                                                                                                                                                                                                                                                                                                                                                                                                                                                                                                                                                                                                                                                                           |
| Complete List of Authors:       | Imai, Yurika ; Fukushima Medical University School of Medicine, Department of Epidemiology<br>Nagai, Masato; Tohoku Medical Megabank Organization, Tohoku University; Graduate School of Medicine, Tohoku University<br>Ohira, Tetsuya; Fukushima Medical University, Department of Epidemiology; Fukushima Medical University School of Medicine, Radiation Medical Center for Fukushima Health Management Survey<br>Shirai, Kokoro ; University of the Ryukyus, Department of Human Sciences, School of Law and Letters<br>Kondo, Naoki; The University of Tokyo School of Public Health, Department of Health and Social Behavior<br>Kondo, Katsunori; Chiba University, Center for Preventive Medical Science; Center for Gerontology and Social Science, National Center for Geriatrics and Gerontology, Department of Gerontological Evaluation |
| <b>Primary Subject Heading</b>: | Complementary medicine                                                                                                                                                                                                                                                                                                                                                                                                                                                                                                                                                                                                                                                                                                                                                                                                                                |
| Secondary Subject Heading:      | Epidemiology, Mental health                                                                                                                                                                                                                                                                                                                                                                                                                                                                                                                                                                                                                                                                                                                                                                                                                           |
| Keywords:                       | Equivalized income, Japan, Laughter,, Older people, Social relationships                                                                                                                                                                                                                                                                                                                                                                                                                                                                                                                                                                                                                                                                                                                                                                              |
|                                 |                                                                                                                                                                                                                                                                                                                                                                                                                                                                                                                                                                                                                                                                                                                                                                                                                                                       |

SCHOLARONE™  
Manuscripts

1 **Research**

2 Laughter associated with income among older Japanese people: The JAGES  
3 project cross-sectional study

4  
5 **Running head:**

6 Association between laughter and income

7  
8 **Keywords:**

9 Equivalized income, Japan, Laughter, Older people, Social relationships

10  
11 **Authors:**

12 Yurika Imai<sup>1</sup>, MD, Masato Nagai, PhD<sup>1, 2, 3</sup>, Tetsuya Ohira, MD, PhD<sup>1,4</sup>,  
13 Kokoro Shirai, PhD<sup>5</sup>, Naoki Kondo, MD, PhD<sup>6</sup>, Katsunori Kondo, MD, PhD<sup>7</sup>,

14 <sup>8</sup>

15  
16 <sup>1</sup> Department of Epidemiology, Fukushima Medical University School of  
17 Medicine, Fukushima, Japan

18 <sup>2</sup> Tohoku Medical Megabank Organization, Tohoku University, Sendai, Japan

19 <sup>3</sup> Graduate School of Medicine, Tohoku University, Sendai, Japan

20 <sup>4</sup> Radiation Medical Science Center for Fukushima Health Management  
21 Survey, Fukushima Medical University, Fukushima, Japan

22 <sup>5</sup> Department of Human Sciences, School of Law and Letters, University of  
23 the Ryukyus, Okinawa, Japan

24 <sup>6</sup> Department of Health and Social Behavior / Department of Health  
25 Education and Health Sociology, School of Public Health, The University of  
26 Tokyo, Tokyo, Japan

27 <sup>7</sup> Center for Preventive Medical Sciences, Chiba University, Chiba, Japan

28 <sup>8</sup> Department of Gerontological Evaluation, Center for Gerontology and  
29 Social Science, National Center for Geriatrics and Gerontology, Aichi, Japan

### 31 **Funding sources**

32 This study was supported by Health Labour Sciences Research Grant,  
33 Comprehensive Research on Aging and Health (H28-Choju-Ippan-002,  
34 H26-Choju-Ippan-006, H25-Choju-Ippan-003, H25-Kenki-Wakate-015,  
35 H25-Irryo-Shitei-003(Fukkou), H24-Junkanki(Syosyu)-Ippan-007) from the  
36 Ministry of Health, Labour and Welfare, Japan; Grant-in-Aid for Scientific  
37 Research (20319338, 22390400, 23243070, 23590786, 23790710, 24140701,  
38 24390469, 24530698, 24653150, 24683018, 25253052, 25870573 2587881,  
39 15H01972, 15KT0007) from the Japan Society for the Promotion of Science;  
40 the Japan Agency for Medical Research and Development (16769793); and a  
41 grant from the National Center for Geriatrics and Gerontology, Japan (24-17,  
42 24-23, J09KF00804)

### 44 **Corresponding author:**

45 Tetsuya Ohira

46 Department of Epidemiology, Fukushima Medical University School of

1  
2  
3  
4  
5 47 Medicine, Hikarigaoka 1, Fukushima, Fukushima 960-1295, Japan.

6  
7 48 Phone: +81-24-547-1344

8  
9 49 Fax: +81-24-547-1336

10  
11 50 E-mail: teohira@fmu.ac.jp.

12  
13  
14 51

15  
16 52 #Word count: 3,243

17  
18 53 #References: 44

19  
20 54 #Tables: 3

21  
22 55 #Figures: 3

23  
24 56 #Page: 34

25  
26  
27 57

28  
29  
30 58

31  
32 59 **ABSTRACT**

33  
34 60 **Objective:** Laughter has positive and quantifiable effect on certain aspects of  
35  
36 61 health. Additionally, previous studies have suggested income influences the  
37  
38 62 emotion. In the present study, we examined the relationship between  
39  
40 63 equivalent income and frequency of laughter by a cross-sectional study.

41  
42 64 **Design:** Cross-sectional study and binomial regression analysis.

43  
44 65 **Setting:** Sampled from 30 municipalities in Japan.

45  
46 66 **Participants:** The 20,752 non-disabled Japanese individuals aged  $\geq 65$  years  
47  
48 67 using data from the Japan Gerontological Evaluation Study.

49  
50 68 **Primary outcome:** Frequency of laughter.

51  
52 69 **Results:** We found laughter increased significantly with an increase in  
53  
54  
55  
56  
57  
58  
59  
60

1  
2  
3  
4  
5 70 equivalent income (P for trend <.0001). After adjustment for age,  
6  
7 71 instrumental activity of daily living (IADL), depression, frequency of  
8  
9 72 meeting friends, number of social groups, and family structure, the PRs with  
10  
11 73 Q4 (men;  $\geq$  €24,420, women;  $\geq$  €21,154) were 1.21 (95% confidence interval:  
12  
13 74 1.13-1.30) among men and 1.14 (1.08-1.20) among women, as compared with  
14  
15 75 Q1 (men; < €12,041, women; < €9,518), respectively. After the exclusion of  
16  
17 76 participants with depression, the association was essentially unchanged.  
18  
19 77 Additionally, we found that inadequate social relationship or living alone  
20  
21 78 were associated with lower frequency of laughter. In comparison with the  
22  
23 79 lowest equivalent income with meeting friends less frequently and living  
24  
25 80 alone, the PRs of the highest equivalent income with meeting friends  
26  
27 81 frequently and living with someone were higher, respectively.  
28  
29  
30  
31

32 **Conclusions:** We demonstrated that there was significant relationship  
33  
34 83 between equivalent income and frequency of laughter. Social relationship  
35  
36 84 and family structure were also associated with frequency of laughter.  
37  
38

39 (237 words)  
40  
41  
42

## 43 **Article summary**

### 44 **Article focus:**

- 45  
46 47 ● Present study described the association between equivalent income,  
48  
49 90 frequency of laughter and social relationship-related factor with 20,752  
50  
51 91 Japanese persons aged  $\geq$ 65 years who were randomly collected  
52  
53  
54 92 throughout Japan  
55  
56  
57  
58  
59  
60

1  
2  
3  
4  
5 93 **Key message:**

- 6  
7 94 ● There was a positive relationship between equivalent income and  
8  
9  
10 95 frequency of laughter.  
11  
12 96 ● Inadequate social relationship or living alone were associated with lower  
13  
14 97 frequency of laughter.  
15  
16 98 ● The positive association between income and health was explained partly  
17  
18 99 by frequency of laughter.  
19  
20  
21 100 ● Intervention for social relation instead of income might be possible to  
22  
23 101 improve laughter.  
24

25  
26  
27 102

28 103 **Strengths and limitations of this study:**

- 29  
30 104 ● This is the first study to report relationships among equalized income,  
31  
32 105 frequency of laughter, and factors relating to social relationships and  
33  
34 106 family structure  
35  
36 107 ● The present study design was cross-sectional, and thus we cannot  
37  
38 108 demonstrate causal relationships.  
39  
40 109 ● The use of self-reported questionnaires may have introduced reporting  
41  
42 110 bias for income and frequency of laughter.  
43  
44  
45

46  
47 111

48 112 **INTRODUCTION**

49  
50 113 In most developed countries, the proportion of older people is growing faster  
51  
52 114 than any other age group. Of these countries, Japan is experiencing  
53  
54 115 population aging at the fastest pace (19.0% in 2003; 25.1% in 2013).<sup>1, 2</sup> The

1  
2  
3  
4  
5 116 need for health promotion and disease prevention targeting older people is  
6  
7 117 increasing. Various health promotion strategies have been recommended for  
8  
9 118 older people, and laughter therapy has been introduced as an important  
10  
11 119 option.<sup>3</sup> Previous studies have suggested that laughter has positive and  
12  
13 120 quantifiable effects on certain aspects of health, such as immune function,<sup>4, 5</sup>  
14  
15 121 allergic dermatitis,<sup>6-8</sup> cancer,<sup>9-11</sup> psychiatric diseases,<sup>12-15</sup> dementia,<sup>16</sup> and  
16  
17 122 cardiovascular diseases.<sup>17, 18</sup> Additionally, laughter therapy improves aspects  
18  
19 123 of mental and physical function in older people,<sup>3</sup> and has therefore been  
20  
21 124 incorporated into complementary medicine. One example of this is a  
22  
23 125 randomized controlled trial of humor therapy in residential care: the Sydney  
24  
25 126 Multisite Intervention of LaughterBosses and ElderClowns (SMILE).<sup>3, 19</sup>  
26  
27 127 This trial has suggested that humor therapy decreases agitation and also  
28  
29 128 increases happiness.<sup>20, 21</sup>

30  
31  
32  
33  
34 129 There is also growing interest in the influence of socioeconomic  
35  
36 130 status on health.<sup>22</sup> Previous studies have reported that socioeconomic status,  
37  
38 131 especially income, influences emotions.<sup>23, 24</sup> The threshold association  
39  
40 132 between income and positive emotion was observed.<sup>24</sup> Income has a positive  
41  
42 133 dose-response relationship with positive emotion up to \$75,000 per year,  
43  
44 134 while insufficient income is a significant predictor for depression.<sup>23</sup> Indeed,  
45  
46 135 the proportion of people with depression in the lowest income group is 15.8%  
47  
48 136 among men and 15.0% among women.<sup>25</sup> Depression is 6.9 times more  
49  
50 137 prevalent for men and 4.1 times more prevalent for women in this income  
51  
52 138 group than it is in the highest income group among Japanese aged 65–69  
53  
54  
55  
56  
57  
58  
59  
60



1  
2  
3  
4  
5 139 years. However, no studies have demonstrated a relationship between  
6  
7 140 income and frequency of laughter.  
8

9 141 In the present study, therefore, we examined the relationship  
10  
11 142 between equivalized income and frequency of laughter among men and  
12  
13 143 women aged 65 years and older in Japan. Our hypothesis was that frequency  
14  
15 144 of laughter would be positively associated with equivalized income. We  
16  
17 145 further hypothesized that social relationships and family structure would  
18  
19 146 modify the association between laughter and income for older people,  
20  
21 147 because personal relationships have been associated with laughter,<sup>26</sup> and  
22  
23 148 living alone has been correlated with reduced psychological well-being.<sup>27</sup>  
24  
25  
26  
27

## 28 149 29 30 150 **METHODS**

### 31 151 **Study sample**

32 152 This study was a cross-sectional study using data from the Japan  
33  
34 153 Gerontological Evaluation Study (JAGES). The JAGES was designed to  
35  
36 154 describe the health status and social determinants of non-disabled people  
37  
38 155 aged 65 years and older, sampled from 30 municipalities in Japan. We used  
39  
40 156 the 2013 wave of JAGES, which was obtained from self-reported  
41  
42 157 questionnaires mailed to 195,290 community-dwelling individuals aged 65  
43  
44 158 years and older who were not eligible to receive benefits from public  
45  
46 159 long-term care insurance services. Of these, 138,293 individuals responded  
47  
48 160 to the survey (response rate = 70.8%). In addition to basic questions, there  
49  
50 161 were five modules in the survey covering different topics.<sup>28</sup> We used one of  
51  
52  
53  
54  
55  
56  
57  
58  
59  
60

1  
2  
3  
4  
5 162 these modules, which included questions about frequency of laughter.  
6  
7 163 Respondents to this module comprised 12,174 men and 14,194 women. We  
8  
9 164 analyzed a total of 20,006 participants (9,912 men and 10,094 women), after  
10  
11 165 excluding 6,362 participants with missing information on frequency of  
12  
13 166 laughter (n = 1,306), annual household income (n = 3,386), and number of  
14  
15 167 people living together (n = 1,670).  
16  
17

18 168 The JAGES protocol was reviewed and approved by the Ethics  
19  
20 169 Committee on Research of Human Subjects at Nihon Fukushi University  
21  
22 170 (Approval No. 10-05). Written informed consent was assumed with voluntary  
23  
24 171 return of the questionnaire.  
25  
26  
27  
28  
29

### 30 173 **Laughter**

31  
32 174 The outcome variable was frequency of laughing. Laughter was assessed  
33  
34 175 through each participant's response to a question about how frequently they  
35  
36 176 laughed out loud during their daily life. The possible item answers were:  
37  
38 177 almost every day, 1–5 days/week, 1–3 days/month, and < 1 day/month. We  
39  
40 178 defined participants as laughing often if they answered “almost every day.”  
41  
42  
43  
44

### 45 180 **Equivalized income**

46  
47 181 Equivalized income was calculated by dividing the median value of the  
48  
49 182 multiple-choice annual household income by the square root of the number of  
50  
51 183 people living together. The annual household income question had 15  
52  
53 184 categories (< 0.5, 0.5–1.0, 1.0–1.5, 1.5–2.0, 2.0–2.5, 2.5–3.0, 3.0–4.0, 4.0–5.0,  
54  
55  
56  
57  
58  
59  
60

1  
2  
3  
4  
5 185 5.0–6.0, 6.0–7.0, 7.0–8.0, 8.0–9.0, 9.0–10.0, 10.0–12.0, and  $\geq 12.0$  million  
6  
7 186 Japanese yen). We used a purchasing power parity rate of EUR€1.00 =  
8  
9 187 JPN¥130 (as of July 2017). We divided the participants into quartiles  
10  
11 188 according to their equivalized income: Q1 (men  $< \text{€}12,041$ ; women  $< \text{€}9,518$ ),  
12  
13 189 Q2 (men  $\text{€}12,041\text{--}\text{€}15,543$ ; women  $\text{€}9,518\text{--}\text{€}14,957$ ), Q3 (men  $\text{€}15,544\text{--}$   
14  
15  $\text{€}24,426$ ; women  $\text{€}14,958\text{--}\text{€}21,153$ ), and Q4 (men  $\geq \text{€}24,420$ ; women  $\geq$   
16  
17  $\text{€}21,154$ ).  
18  
19  
20  
21  
22

### 23 193 **Measures and definitions**

24  
25 194 Instrumental activity of daily living (IADL) was assessed using the Tokyo  
26  
27 195 Metropolitan Institute of Gerontology Index of Competence,<sup>29</sup> and the results  
28  
29 196 were classified as high IADL (5 points) or low IADL ( $\leq 4$  points). The  
30  
31 197 evaluation of depression was made using the Geriatric Depression Scale  
32  
33 198 (GDS).<sup>30</sup> GDS is a 15-item questionnaire, with a score range of 1–15.<sup>31</sup>  
34  
35 199 Following previous research,<sup>32, 33</sup> participants were classified into two  
36  
37 200 groups: not depressed (GDS  $< 5$ ) and depressed (GDS  $\geq 5$ ).  
38  
39  
40

41 201 Frequency of meeting friends and acquaintances was measured with  
42  
43 202 a question comprising six categories ( $\geq 4$  days/week, 2–3 days/week, 1  
44  
45 203 day/week, 1–3 days/month, several times/year, and none). We divided the  
46  
47 204 respondents into three groups:  $< 2$  times/week,  $\geq 2$  times/week, or missing.  
48  
49

50 205 Participants were also presented with 14 different civic associations  
51  
52 206 and social groups, and asked with which ones they were regularly connected;  
53  
54 207 this provided a measurement, divided into six categories, for each type of  
55  
56  
57  
58  
59  
60

1  
2  
3  
4  
5 208 social group ( $\geq 4$  days/week, 2–3 days/week, 1 day/week, 1–3 days/month,  
6  
7 209 several times/year, no participation). The total number of types of groups in  
8  
9 210 which each respondent participated at least several times per year was  
10  
11 211 tallied, and respondents were divided into four groups: 0, 1 or 2,  $\geq 3$ , or  
12  
13  
14 212 missing.

15  
16 213 Family structure was assessed through two questions: one regarding  
17  
18 214 the number of people living together, and the other regarding marital status.  
19  
20 215 The marital status question provided five answer categories (married,  
21  
22 216 bereaved, divorced, never married, and other). Based on answers to these  
23  
24 217 questions, we divided the participants into four groups: alone,  $\geq 2$  without  
25  
26 218 partner,  $\geq 2$  with partner, or  $\geq 2$  with no information about marital status.  
27  
28  
29

### 30 219

### 31

### 32 220 **Statistical analysis**

### 33

34 221 We used binomial regression analyses to derive prevalence ratios (PRs)  
35  
36 222 based on 95% confidence intervals (CIs) for “laughing almost every day”  
37  
38 223 according to equivalized income. Following recent statistical  
39  
40 224 recommendations, we calculated PRs rather than odds ratios because  
41  
42 225 prevalence of laughing almost every day was not rare ( $\geq 10\%$ ).<sup>34</sup> We used the  
43  
44 226 SAS version 9.4 statistical software package. In each model, the lowest  
45  
46 227 equivalized income category was set as the reference category. A “missing”  
47  
48 228 category was used in analysis to account for missing values in response to  
49  
50 229 questions. In Model 1, we controlled for age (65–69, 70–74, 75–79, 80–84,  $\geq$   
51  
52 230 85), IADL (high IADL, low IADL, or missing), and depression (no depression,  
53  
54  
55  
56  
57  
58  
59  
60

1  
2  
3  
4  
5 231 depression, or missing). Model 2 was adjusted for the covariates in Model 1  
6  
7 232 plus social relationship-related factor such as frequency of meeting friends (<  
8  
9 233 2 times/week,  $\geq 2$  times/week, or missing) and number of social groups (0, 1  
10  
11 234 or 2,  $\geq 3$ , or missing), and family structure (alone,  $\geq 2$  without partner,  $\geq 2$   
12  
13 235 with partner, or  $\geq 2$  with no information about marital status). Additionally,  
14  
15 236 to confirm the robustness of our results we also carried out the same series of  
16  
17 237 analysis using the sample excluding subjects with depression ( $GDS \geq 5$ ) and  
18  
19 238 missing information about depression. There might be bias due to depression  
20  
21 239 because people with depression might seldom laugh and depression  
22  
23 240 influences employment and income.

24  
25  
26  
27 241 To assess whether the prevalence of laughter associated with  
28  
29 242 equivalized income differed between social relationships (frequency of  
30  
31 243 meeting friends or number of social groups) or family structure, we  
32  
33 244 conducted a sub-analysis in which participants were cross-classified into  
34  
35 245 groups according to their equivalized income; the lowest equivalized income  
36  
37 246 group was treated with each inadequate social relationship (meeting friends  
38  
39 247 less frequently or non-participation in an organization) or living alone as the  
40  
41 248 reference categories. The  $p$  value for the trend was calculated by categorical  
42  
43 249 variables. All  $p$  values were two-tailed, and differences of  $< 0.05$  were  
44  
45 250 accepted as statistically significant.

46  
47  
48  
49  
50 251

## 51 52 252 **RESULTS**

### 53 54 253 **Baseline characteristic by equivalized income**

1  
2  
3  
4  
5 254 Table 1 shows the baseline characteristics of the study participants  
6  
7 255 according to the categories of equivalized income. The proportions for  
8  
9 256 laughing almost every day were 37.2% for men and 47.6% for women; these  
10  
11 257 proportions increased as equivalized income increased for both men and  
12  
13  
14 258 women. The proportion of respondents who reported laughing < 1  
15  
16 259 time/month was 9.7% for men and 5.3% for women. The mean age was  
17  
18 260 highest in the lowest equivalized income group for both men and women. The  
19  
20  
21 261 proportion of low IADL and depression decreased as equivalized income  
22  
23 262 increased. Meeting friends and participating in social groups increased with  
24  
25 263 a rise in equivalized income. The proportion of people co-habiting was  
26  
27 264 highest in Q2 for men and in Q3 for women.  
28  
29  
30  
31  
32  
33  
34  
35  
36  
37  
38  
39  
40  
41  
42  
43  
44  
45  
46  
47  
48  
49  
50  
51  
52  
53  
54  
55  
56  
57  
58  
59  
60

Table 1. Baseline characteristics by categories of household income

|                                     | Equivalentized income <sup>a</sup> |            |            |            | P value <sup>b</sup> |
|-------------------------------------|------------------------------------|------------|------------|------------|----------------------|
|                                     | Q1                                 | Q2         | Q3         | Q4         |                      |
| Men                                 |                                    |            |            |            |                      |
| Number of participants              | 2628                               | 2454       | 2739       | 2480       |                      |
| Frequency of laughing (%)           |                                    |            |            |            |                      |
| Almost everyday                     | 30.9                               | 35.3       | 38.7       | 44.2       | <0.0001              |
| 1-5 times/week                      | 37.6                               | 38.7       | 39.0       | 37.4       |                      |
| 1-3 times/month                     | 16.7                               | 16.5       | 14.3       | 12.0       |                      |
| <1 time/month                       | 14.8                               | 9.6        | 8.0        | 6.4        |                      |
| Age (years) (%)                     |                                    |            |            |            |                      |
| 65-69                               | 24.5                               | 30.2       | 32.3       | 36.8       | <0.0001              |
| 70-74                               | 29.9                               | 31.3       | 31.0       | 28.9       |                      |
| 75-80                               | 25.5                               | 23.4       | 19.8       | 17.8       |                      |
| 80-85                               | 14.3                               | 10.8       | 12.0       | 11.4       |                      |
| ≥85                                 | 5.9                                | 4.3        | 5.0        | 5.1        |                      |
| Mean age (years) (SD <sup>c</sup> ) | 74.3 (6.0)                         | 73.3 (5.8) | 73.2 (6.0) | 72.8 (6.1) | <0.0001              |
| IADL <sup>c</sup> (%)               |                                    |            |            |            |                      |
| High IADL                           | 64.7                               | 74.0       | 77.1       | 77.6       | <0.0001              |
| Low IADL                            | 30.0                               | 22.9       | 20.0       | 20.5       |                      |
| Missing                             | 5.4                                | 3.1        | 2.9        | 1.9        |                      |
| Frequency of meeting friends (%)    |                                    |            |            |            |                      |
| <2 time/week                        | 67.2                               | 68.3       | 68.2       | 62.8       | <0.0001              |
| ≥2 time/week                        | 27.6                               | 28.0       | 28.7       | 34.5       |                      |
| Missing                             | 5.3                                | 3.8        | 3.2        | 2.7        |                      |
| Number of social groups (%)         |                                    |            |            |            |                      |
| 0                                   | 29.0                               | 22.9       | 21.1       | 19.1       | <0.0001              |
| 1 or 2                              | 25.3                               | 27.4       | 29.5       | 28.1       |                      |
| ≥3                                  | 30.2                               | 36.8       | 38.8       | 42.6       |                      |
| Missing                             | 15.5                               | 12.9       | 10.7       | 10.2       |                      |
| Family structure (%)                |                                    |            |            |            |                      |
| alone                               | 10.5                               | 6.4        | 8.9        | 6.7        | <0.0001              |
| ≥2 without partner                  | 7.5                                | 4.7        | 4.1        | 4.9        |                      |
| ≥2 with partner                     | 79.5                               | 88.2       | 86.7       | 88.1       |                      |
| ≥2 with no information              | 2.6                                | 0.6        | 0.3        | 0.3        |                      |
| about marital status                |                                    |            |            |            |                      |
| Depression (%)                      |                                    |            |            |            |                      |
| No depression                       | 49.3                               | 64.7       | 71.5       | 78.4       | <0.0001              |
| Depression                          | 35.8                               | 24.5       | 19.5       | 13.5       |                      |
| Missing                             | 14.9                               | 10.9       | 9.0        | 8.2        |                      |

265

(Cont Table 1)

|                                             | Equivalent income |           |           |           | P value |
|---------------------------------------------|-------------------|-----------|-----------|-----------|---------|
|                                             | Q1                | Q2        | Q3        | Q4        |         |
| Women                                       |                   |           |           |           |         |
| Number of participants                      | 2688              | 2169      | 2863      | 2731      |         |
| Frequency of laughing (%)                   |                   |           |           |           |         |
| Almost everyday                             | 41.9              | 40.5      | 51.1      | 55.2      | <0.0001 |
| 1-5 times/week                              | 38                | 41        | 37.9      | 35.1      |         |
| 1-3 times/month                             | 11.4              | 12.2      | 7.7       | 6.6       |         |
| <1 time/month                               | 8.7               | 6.3       | 3.4       | 3.1       |         |
| Age (years) (%)                             |                   |           |           |           |         |
| 65-69                                       | 23                | 28.3      | 33.7      | 34.5      | <0.0001 |
| 70-74                                       | 30.4              | 31.2      | 32.3      | 29.6      |         |
| 75-80                                       | 25.3              | 21.5      | 20.8      | 17.7      |         |
| 80-85                                       | 14.5              | 13.1      | 9.4       | 12.5      |         |
| ≥85                                         | 6.9               | 5.9       | 3.8       | 5.8       |         |
| Mean age (years) (SD)                       | 74.6(6.1)         | 73.8(6.0) | 72.8(5.7) | 73.2(6.3) | <0.0001 |
| IADL (%)                                    |                   |           |           |           |         |
| High IADL                                   | 80.7              | 86.7      | 90.3      | 88.4      | <0.0001 |
| Low IADL                                    | 15.1              | 10.5      | 7.7       | 9         |         |
| Missing                                     | 4.3               | 2.8       | 2         | 2.7       |         |
| Frequency of meeting friends (%)            |                   |           |           |           |         |
| <2 time/week                                | 53.5              | 55.2      | 54.4      | 54        | <0.0001 |
| ≥2 time/week                                | 40                | 40.6      | 42.3      | 43.4      |         |
| Missing                                     | 6.5               | 4.2       | 3.3       | 2.7       |         |
| Number of social groups (%)                 |                   |           |           |           |         |
| 0                                           | 26.1              | 23.1      | 18.6      | 19.4      | <0.0001 |
| 1 or 2                                      | 25.7              | 26.1      | 28.9      | 26.9      |         |
| ≥3                                          | 25.6              | 34.1      | 38.8      | 41.8      |         |
| Missing                                     | 22.7              | 16.7      | 13.7      | 11.9      |         |
| Family structure (%)                        |                   |           |           |           |         |
| alone                                       | 17.6              | 39.5      | 9.8       | 11.4      | <0.0001 |
| ≥2 without partner                          | 27.1              | 12.3      | 15.3      | 22.6      |         |
| ≥2 with partner                             | 51.8              | 47.2      | 74.2      | 65.4      |         |
| ≥2 with no information about marital status | 3.5               | 1.1       | 0.7       | 0.6       |         |
| Depression (%)                              |                   |           |           |           |         |
| No depression                               | 52                | 57.3      | 68.2      | 73        | <0.0001 |
| Depression                                  | 28.1              | 24.9      | 17.5      | 13.6      |         |
| Missing                                     | 19.9              | 17.9      | 14.3      | 13.5      |         |

<sup>a</sup> Q1 (men; <€12,041, women; <€9,518), Q2 (men; €12,041-€15,543, women; €9,518-€14,957), Q3 (men; €15,544-€24,426, women; €14,958-€21,153), Q4 (men; ≥€24,427, women; ≥€21,154).

<sup>b</sup> P values were calculated by chi-squared test (categorical variables), or ANOVA (continuous variables).

266 <sup>c</sup> SD, standard deviation; IADL, instrumental activity of daily living.



1  
2  
3  
4  
5 267 **Equivalized income and frequency of laughter**

6  
7 268 Table 2 shows the results of our binomial regression models for frequency of  
8  
9 269 laughter according to equivalized income. Equivalized income was  
10  
11 270 significantly associated with frequency of laughter among both men and  
12  
13 271 women. The PRs tended to amplify as equivalized income increased.  
14  
15 272 Compared with those in the lowest equivalized income group, the  
16  
17 273 age-adjusted PRs of laughing almost every day for participants in the  
18  
19 274 highest equivalized income group were greater: 1.43 (95% CI, 1.33–1.54) for  
20  
21 275 men, and 1.30 (1.23–1.38) for women. After adjusting for age, IADL,  
22  
23 276 depression, frequency of meeting friends, number of social groups, and  
24  
25 277 family structure, the PRs decreased to 1.21 for men and 1.14 for women in  
26  
27  
28 278 this group; however, the association was essentially unchanged.  
29  
30  
31  
32  
33  
34  
35  
36  
37  
38  
39  
40  
41  
42  
43  
44  
45  
46  
47  
48  
49  
50  
51  
52  
53  
54  
55  
56  
57  
58  
59  
60

Table 2. Prevalence Ratios and 95% confidence intervals of frequency of laughing according to equivalized income.

|                                              | Equivalized income <sup>a</sup> |                 |                 |                 | P for trend <sup>b</sup> |
|----------------------------------------------|---------------------------------|-----------------|-----------------|-----------------|--------------------------|
|                                              | Q1                              | Q2              | Q3              | Q4              |                          |
| <b>Men</b>                                   |                                 |                 |                 |                 |                          |
| No. of participants                          | 2628                            | 2454            | 2739            | 2480            |                          |
| No. of participants laughing almost everyday | 812                             | 866             | 1060            | 1096            |                          |
| Crude                                        | reference                       | 1.14(1.06-1.24) | 1.25(1.16-1.35) | 1.43(1.33-1.54) | <0.0001                  |
| Age-adjusted                                 | reference                       | 1.13(1.05-1.22) | 1.25(1.16-1.34) | 1.43(1.33-1.54) | <0.0001                  |
| Multi-adjusted Model 1 <sup>c</sup>          | reference                       | 1.04(0.96-1.13) | 1.12(1.04-1.21) | 1.24(1.16-1.34) | <0.0001                  |
| Multi-adjusted Model 2 <sup>d</sup>          | reference                       | 1.03(0.96-1.11) | 1.12(1.05-1.21) | 1.21(1.13-1.30) | <0.0001                  |
| <b>Women</b>                                 |                                 |                 |                 |                 |                          |
| No. of participants                          | 2688                            | 2169            | 2863            | 2731            |                          |
| No. of participants laughing almost everyday | 1126                            | 879             | 1462            | 1507            |                          |
| Crude                                        | reference                       | 0.97(0.90-1.04) | 1.22(1.15-1.29) | 1.32(1.25-1.39) | <0.0001                  |
| Age-adjusted                                 | reference                       | 0.96(0.89-1.02) | 1.19(1.13-1.26) | 1.30(1.23-1.38) | <0.0001                  |
| Multi-adjusted Model 1 <sup>c</sup>          | reference                       | 0.92(0.86-0.99) | 1.09(1.03-1.15) | 1.16(1.10-1.23) | <0.0001                  |
| Multi-adjusted Model 2 <sup>d</sup>          | reference                       | 0.98(0.92-1.05) | 1.06(1.00-1.12) | 1.14(1.08-1.20) | <0.0001                  |

<sup>a</sup> Q1 (men; <€12,041, women; <€9,518), Q2 (men; €12,041-€15,543, women; €9,518-€14,957), Q3 (men; €15,544-€24,426, women; €14,958-€21,153), Q4 (men; ≥€24,427, women; ≥€21,154).

<sup>b</sup> P for trend was calculated by categorical variables.

<sup>c</sup> Model 1 is adjusted for age (5-years category), instrumental activity of daily living (independent, not independent, missing), depression (no depression, depression, missing).

<sup>d</sup> Model 2 is adjusted for the covariates in Model 1 plus frequency of meeting friends (<2 time/week, ≥2 time/week, missing), number of social groups (0, 1 or 2, ≥3, missing), family structure (alone, ≥2 without partner, ≥2 with partner, ≥2 with no information about marital status).

1  
2  
3  
4  
5 280 Table 3 shows the results of our binomial regression models for  
6  
7 281 frequency of laughter according to equivalized income, using a sample that  
8  
9 282 excluded participants with depression ( $GDS \geq 5$ ) and missing information  
10  
11 283 about depression. The associations remained unchanged after these  
12  
13  
14 284 exclusions. The PRs of laughing almost every day for men and women with  
15  
16 285 the highest equivalized income were 1.23 (95% CI, 1.13–1.34) and 1.10 (1.04–  
17  
18 286 1.17), respectively.  
19  
20  
21  
22  
23  
24  
25  
26  
27  
28  
29  
30  
31  
32  
33  
34  
35  
36  
37  
38  
39  
40  
41  
42  
43  
44  
45  
46  
47  
48  
49  
50  
51  
52  
53  
54  
55  
56  
57  
58  
59  
60

Table 3. Prevalence Ratios and 95% confidence intervals of frequency of laughing according to equivalized income for no depression people.

|              |                                              | Equivalized income <sup>a</sup> |                 |                 |                 | P for trend <sup>b</sup> |
|--------------|----------------------------------------------|---------------------------------|-----------------|-----------------|-----------------|--------------------------|
|              |                                              | Q1                              | Q2              | Q3              | Q4              |                          |
| <b>Men</b>   |                                              |                                 |                 |                 |                 |                          |
|              | No. of participants with no depression       | 1296                            | 1587            | 1958            | 1943            |                          |
|              | No. of participants laughing almost everyday | 499                             | 634             | 875             | 945             |                          |
|              | Multi-adjusted <sup>c</sup>                  | reference                       | 1.01(0.93-1.11) | 1.15(1.06-1.25) | 1.23(1.13-1.34) | <0.0001                  |
| <b>Women</b> |                                              |                                 |                 |                 |                 |                          |
|              | No. of participants with no depression       | 1398                            | 1242            | 1953            | 1993            |                          |
|              | No. of participants laughing almost everyday | 755                             | 602             | 1122            | 1209            |                          |
|              | Multi-adjusted                               | reference                       | 0.94(0.87-1.01) | 1.03(0.97-1.09) | 1.10(1.04-1.17) | <0.0001                  |

<sup>a</sup> Q1 (men; <€12,041, women; <€9,518), Q2 (men; €12,041-€15,543, women; €9,518-€14,957), Q3 (men; €15,544-€24,426, women; €14,958-€21,153), Q4 (men; ≥€24,427, women; ≥€21,154).

<sup>b</sup> P for trend was calculated by categorical variables.

<sup>c</sup> Prevalence Ratios is adjusted for age (5-years category), instrumental activity of daily living (independent, not independent, missing), frequency of meeting friends (<2 time/week, ≥2 time/week, missing), number of social groups (0, 1 or 2, ≥3, missing), family structure (alone, ≥2 without partner, ≥2 with partner, ≥2 with no information about marital status).

287

288

1  
2  
3  
4  
5 289 **Frequency of laughter according to equivalized income, by social**  
6  
7 290 **relationships and family structures**  
8

9 291 Figure 1, 2, and 3 shows the results of a sub-analysis, which examined  
10  
11 292 interactions between income and laughing almost every day, by social  
12  
13 293 relationships and family structure. While we observed no significant  
14  
15 294 interactions ( $p$  for interaction: frequency of meeting friends = 0.73 for men;  
16  
17 295 number of social groups = 0.20 for men, 0.11 for women; family structure =  
18  
19 296 0.86 for men, 0.52 for women) without frequency of meeting friends in  
20  
21 297 women, we found that inadequate social relationships (particularly meeting  
22  
23 298 friends less frequently or living alone) were associated with lower frequency  
24  
25 299 of laughter. The PR for men in the lowest equivalized income group who met  
26  
27 300 more often with friends was 1.39 (95% CI: 1.24–1.56), while for men in the  
28  
29 301 highest equivalent income group who met less frequently with friends, the  
30  
31 302 PR was 1.29 (1.17–1.42). The PR for women in the lowest equivalized income  
32  
33 303 group who met more often with friends was 1.28 (1.17–1.40), while for  
34  
35 304 women in the highest equivalized income group who met with friends less  
36  
37 305 frequently, the PR was 1.23 (1.13–1.33). In family structure, the PR for men  
38  
39 306 in the lowest equivalized income group who lives  $\geq 2$  with partner was 1.67  
40  
41 307 (95% CI: 1.28–2.17), while for men in the highest equivalent income group  
42  
43 308 who lives alone, the PR was 1.31 (0.92–1.87). The PR for women in the lowest  
44  
45 309 equivalized income group who met more often with friends was 1.45 (1.25–  
46  
47 310 1.68), while for women in the highest equivalized income group who met with  
48  
49 311 friends less frequently, the PR was 1.10 (0.90–1.34). Among women but not  
50  
51  
52  
53  
54  
55  
56  
57  
58  
59  
60

1  
2  
3  
4  
5 312 men, we observed statistically significant associations between equivalized  
6  
7 313 income and frequency of laughter if there were inadequate social  
8  
9 314 relationships such as meeting friends less frequently or non-participation in  
10  
11 315 organizations. However, we observed no statistically significant associations  
12  
13 316 between equivalized income and frequency of laughter if the women had  
14  
15 317 richer social relationships such as meeting friends more frequently or  
16  
17 318 participating in more social groups.  
18  
19  
20  
21  
22  
23  
24

319

320

## 321 **DISCUSSION**

322 The aim of this study was to examine and describe a relationship between  
323 frequency of laughter and equivalized income amongst older people in Japan.  
324 We found a positive association between equivalized income and frequency of  
325 laughter in both men and women. Importantly, this association differed  
326 depending on family structure and frequency of meeting friends. Among  
327 women participants, moreover, this association became weaker when they  
328 met friends frequently or participated in more social groups; we did not find  
329 a similar trend among participating men. Therefore, social relationships and  
330 family structure may be a factor that could be used to modify the association  
331 between equivalized income and frequency of laughter.

332 While the present study showed an association between equivalized  
333 income and frequency of laughter, previous studies have shown that  
334 depression decreases frequency of laughter,<sup>35</sup> and that household income

1  
2  
3  
4  
5 335 influences mental health.<sup>36</sup> Recognizing that our results may have reflected  
6  
7 336 bias because of participant depression, we conducted further analyses after  
8  
9 337 excluding participants with depression. Nevertheless, the tendency did not  
10  
11 338 change. We believe that this result supports the original design of this study,  
12  
13  
14 339 which posited that frequency of laughter is associated with income  
15  
16 340 regardless of depression.

17  
18 341 Previous studies, however, have indicated that people who had more  
19  
20 342 money had more opportunity to come in contact with others.<sup>37</sup> Coming in  
21  
22 343 contact with others, moreover, is considered important to subjective  
23  
24 344 well-being.<sup>38</sup> It is possible, then, that wealthier people laugh more frequently  
25  
26 345 because they have more opportunities to meet others. Therefore, we  
27  
28 346 examined the influence of social relationship factors and family structure on  
29  
30 347 the relationship between equivalized income and frequency of laughter.

31  
32  
33  
34 348 In a cross-classification analysis of equivalized income and frequency  
35  
36 349 of meeting friends, we found that meeting friends was associated with  
37  
38 350 frequency of laughter for both men and women. A study of older Japanese  
39  
40 351 people indicated that friendship was important for subjective well-being;<sup>38</sup>  
41  
42 352 friendship decreases loneliness and anxiety, and increases happiness.<sup>39</sup>  
43  
44 353 These findings suggest that meeting friends leads to increasing  
45  
46 354 opportunities for laughter.

47  
48  
49  
50 355 In a cross-classification analysis of equivalized income and number of  
51  
52 356 social groups, we observed no significant associations between participating  
53  
54 357 in social groups and frequency of laughter among men in Q1–3; however, the

1  
2  
3  
4  
5 358 PRs of men in Q4 tended to amplify as their number of social groups  
6  
7 359 increased. Previous research has suggested that relative poverty might be a  
8  
9 360 risk factor for poor emotional well-being among older men;<sup>40</sup> for an older man,  
10  
11 361 relative poverty had a bigger impact on well-being than social isolation. In  
12  
13 362 the present study, relatively poor men (Q1–3) laughed less frequently  
14  
15 363 regardless of the number of social groups in which they participated. By  
16  
17 364 contrast, the PRs were higher for women in wealthier groups (Q3 and Q4)  
18  
19 365 and/or those participating in three or more social groups. For older women,  
20  
21 366 interpersonal relationships might have a strong protective or buffering effect  
22  
23 367 for psychosocial stress.<sup>40</sup> In the present study, they laughed frequently even  
24  
25 368 if they had a low equivalized income. Larson reviewed research from the past  
26  
27 369 30 years about subjective well-being of older Americans,<sup>41</sup> and found a  
28  
29 370 positive correlation between social activity and well-being.  
30  
31  
32  
33

34 371 In our cross-classification analysis on equivalized income and family  
35  
36 372 structure, we found positive association between number of family members  
37  
38 373 and frequency of laughter for both men and women. However, for men  
39  
40 374 without a partner, no association was evident. Particularly for men, a spouse  
41  
42 375 has a bigger influence than someone else.<sup>42</sup> The present study showed that  
43  
44 376 poor men living with a wife laughed more frequently than wealthy men  
45  
46 377 without a wife. For women, however, living with someone was important for  
47  
48 378 laughter, whether that partner was their husband or not. This difference is  
49  
50 379 likely to be occurred by following reason. Wife's satisfaction with her partner  
51  
52 380 and with the marital relationship has been shown to be remarkably lower  
53  
54  
55  
56  
57  
58  
59  
60



1  
2  
3  
4  
5 381 than those of husband in Japan.<sup>43</sup> Indeed, we found that factors relating to  
6  
7 382 social relationships were associated with frequency of laughter. This finding  
8  
9 383 supports our hypothesis that wealthier people laugh more frequently than  
10  
11 384 poorer people because they have more opportunities to come into contact  
12  
13  
14 385 with others.  
15

16 386 Implications from this study for public health are twofold. First, given  
17  
18 387 the multiple positive effects of laughing on certain aspects of health,<sup>3-7, 9-18</sup>  
19  
20 388 income redistribution policies may have additional benefits for impoverished  
21  
22 389 older people. That is, increased income may improve not only material  
23  
24 390 conditions but also psychosocial health and cognitive ability. Second, while  
25  
26 391 income redistribution policy reform may take a long time to implement,  
27  
28 392 public health interventions that provide opportunities for more social  
29  
30 393 interactions in local settings may help reduce the laughter deprivation  
31  
32 394 among low-income populations.  
33  
34  
35

36 395 To the best of our knowledge, this is the first study to report  
37  
38 396 relationships among equivalized income, frequency of laughter, and factors  
39  
40 397 relating to social relationships and family structure. However, there are  
41  
42 398 several potential limitations that should be mentioned. First, the present  
43  
44 399 study design was cross-sectional, and thus we cannot demonstrate causal  
45  
46 400 relationships. However, longitudinal analyses of our cohort data can be used  
47  
48 401 to address such issues in future research. Second, the use of self-reported  
49  
50 402 questionnaires may have introduced reporting bias for income and frequency  
51  
52 403 of laughter. For example, some participants may not know or accurately  
53  
54  
55  
56  
57  
58  
59  
60

1  
2  
3  
4  
5 404 remember their income or their laughter frequency. Third, we did not take  
6  
7 405 the diversity of laughter into account: one study reported three different  
8  
9 406 types of laughter: “laughter of pleasure,” “laughter of social obligation,” and  
10  
11 407 “laughter as relief from tension”.<sup>44</sup> “Laughter of pleasure” is an expression of  
12  
13 408 pleasant emotions. “Laughter of social obligation” is a way of communicating  
14  
15 409 in interaction with others; this laughter occurs consciously. “Laughter as  
16  
17 410 relief from tension” occurs when strain dissipates or is removed. Further  
18  
19 411 research is needed to consider these differences in laughter relative to  
20  
21 412 equivalized income.  
22  
23  
24  
25

413

## 414 **CONCLUSION**

415 In this study, we demonstrated a relationship between equivalized income  
416 and frequency of laughter. Additionally, we found an association between  
417 frequency of laughter and factors relating to social relationships,  
418 particularly family structure and frequency of meeting friends. We suggest  
419 that people with a high income may improve their health through high  
420 frequency of laughter. Future research should foreground health  
421 improvements for older people.  
422  
423

424

425

## 426 **ACKNOWLEDGMENTS**

427 This study used data from the Japan Gerontological Evaluation Study  
428 (JAGES), conducted by the Nihon Fukushi University Center for Well-Being  
429  
430

1  
2  
3  
4  
5 427 and Society, for one of their research projects. We are extremely grateful to  
6  
7 428 study participants for the use of their personal data. We would like to  
8  
9 429 express our deepest gratitude to everyone who participated in the surveys.

10  
11 430 This study was supported by Health Labour Sciences Research Grant,  
12  
13 431 Comprehensive Research on Aging and Health (H28-Choju-Ippan-002,  
14  
15 432 H26-Choju-Ippan-006, H25-Choju-Ippan-003, H25-Kenki-Wakate-015,  
16  
17 433 H25-Irryo-Shitei-003(Fukkou), H24-Junkanki(Syosyu)-Ippan-007) from the  
18  
19 434 Ministry of Health, Labour and Welfare, Japan; Grant-in-Aid for Scientific  
20  
21 435 Research (20319338, 22390400, 23243070, 23590786, 23790710, 24140701,  
22  
23 436 24390469, 24530698, 24653150, 24683018, 25253052, 25870573 2587881,  
24  
25 437 15H01972, 15KT0007) from the Japan Society for the Promotion of Science;  
26  
27 438 the Japan Agency for Medical Research and Development (16769793); and a  
28  
29 439 grant from the National Center for Geriatrics and Gerontology, Japan (24-17,  
30  
31 440 24-23, J09KF00804)

#### 41 443 **Conflict of Interest**

42  
43 444 This was not an industry supported study. The authors declare that they  
44  
45 445 have no conflicts of interest.

#### 46 47 446 48 49 447 **Authors' contributions**

50  
51 448 Yurika Imai, Masato Nagai and Tetsuya Ohira contributed to the design of  
52  
53 449 the study. Naoki Kondo, Kokoro Shirai and Katsunori Kondo participated in  
54  
55  
56  
57  
58  
59  
60

1  
2  
3  
4  
5 450 data collection. Yurika Imai and Masato Nagai participated in data analysis.  
6  
7 451 Yurika Imai, Masato Nagai and Tetsuya Ohira participated in writing the  
8  
9 452 report. All authors participated in critical revision of the manuscript and  
10  
11 453 approved the final version of the report for submission.  
12  
13  
14 454

#### 15 16 455 **Ethical approval**

17  
18 456 The JAGES protocol was reviewed and approved by the Ethics Committee on  
19  
20 457 Research of Human Subjects at Nihon Fukushi University (Approval No.  
21  
22 458 10-05). Written informed consent was assumed with voluntary return of the  
23  
24 459 questionnaire.  
25  
26  
27 460

#### 28 29 30 461 **Data sharing**

31  
32 462 No additional data available.  
33  
34 463  
35  
36 464

#### 37 38 39 465 **REFERENCES**

- 40  
41 466 1. Cabinet Office. The Aging Society: Current Situation and  
42  
43 467 Implementation Measures FY 2013. 2014. Available from:  
44  
45 468 [http://www8.cao.go.jp/kourei/english/annualreport/2014/2014pdf\\_e.ht](http://www8.cao.go.jp/kourei/english/annualreport/2014/2014pdf_e.html)  
46  
47 469 [ml](http://www8.cao.go.jp/kourei/english/annualreport/2014/2014pdf_e.html).  
48  
49  
50 470 2. Cabinet Office. The Status of Aging and Implementation of Measures  
51  
52 471 for the Aging Society in FY 2003. 2004. Available from:  
53  
54 472 <http://www8.cao.go.jp/kourei/english/annualreport/2004/04wp-e.html>.  
55  
56  
57  
58  
59  
60

- 1  
2  
3  
4  
5 473 3. Bennett MP, Lengacher C. Humor and Laughter May Influence  
6  
7 474 Health: III. Laughter and Health Outcomes. *Evid Based Complement*  
8  
9 475 *Alternat Med* 2008; 5: 37-40.
- 10  
11 476 4. Sakai Y, Takayanagi K, Ohno M, et al. A trial of improvement of  
12  
13  
14 477 immunity in cancer patients by laughter therapy. *Jpn Hosp* 2013:  
15  
16 478 53-59.
- 17  
18 479 5. Bennett MP, Zeller JM, Rosenberg L, et al. The effect of mirthful  
19  
20  
21 480 laughter on stress and natural killer cell activity. *Altern Ther Health*  
22  
23 481 *Med* 2003; 9: 38-45.
- 24  
25 482 6. Kimata H. Laughter counteracts enhancement of plasma  
26  
27 483 neurotrophin levels and allergic skin wheal responses by mobile  
28  
29 484 phone-mediated stress. *Behav Med* 2004; 29: 149-152.
- 30  
31 485 7. Kimata H. Laughter elevates the levels of breast-milk melatonin. *J*  
32  
33 486 *Psychosom Res* 2007; 62: 699-702.
- 34  
35 487 8. Kimata H. Increase in dermcidin-derived peptides in sweat of patients  
36  
37 488 with atopic eczema caused by a humorous video. *J Psychosom Res*  
38  
39 489 2007; 62: 57-59.
- 40  
41 490 9. Bellert JL. Humor. *A therapeutic approach in oncology nursing.*  
42  
43 491 *Cancer Nurs* 1989; 12: 65-70.
- 44  
45 492 10. Erdman L. Laughter therapy for patients with cancer. *Oncol Nurs*  
46  
47 493 *Forum* 1991; 18: 1359-1363.
- 48  
49 494 11. Penson RT, Partridge RA, Rudd P, et al. Laughter: the best medicine?  
50  
51 495 *Oncologist* 2005; 10: 651-660.

- 1  
2  
3  
4  
5 496 12. Saper B. The therapeutic use of humor for psychiatric disturbances of  
6  
7 497 adolescents and adults. *Psychiatr Q* 1990; 61: 261-272.  
8  
9 498 13. Gelkopf M, Kreitler S, Sigal M. Laughter in a psychiatric ward.  
10  
11 499 Somatic, emotional, social, and clinical influences on schizophrenic  
12  
13 500 patients. *J Nerv Ment Dis* 1993; 181: 283-289.  
14  
15  
16 501 14. van Alphen PJ. Humor as diagnostic and therapeutic tool in  
17  
18 502 psychiatry. Laughter is healthy. *TVZ* 1997; 107: 674-677.  
19  
20  
21 503 15. Kim SH, Kim YH, Kim HJ. Laughter and Stress Relief in Cancer  
22  
23 504 Patients: A Pilot Study. *Evid Based Complement Alternat Med* 2015:  
24  
25 505 864739.  
26  
27 506 16. Takeda M, Hashimoto R, Kudo T, et al. Laughter and humor as  
28  
29 507 complementary and alternative medicines for dementia patients.  
30  
31 508 *BMC Complement Altern Med* 2010; 10: 28.  
32  
33  
34 509 17. Hayashi K, Kawachi I, Ohira T, et al. Laughter is the Best Medicine?  
35  
36 510 A Cross-Sectional Study of Cardiovascular Disease Among Older  
37  
38 511 Japanese Adults. *J Epidemiol* 2016; 26: 546-552.  
39  
40  
41 512 18. Dolgoff-Kaspar R, Baldwin A, Johnson MS, et al. Effect of laughter  
42  
43 513 yoga on mood and heart rate variability in patients awaiting organ  
44  
45 514 transplantation: a pilot study. *Altern Ther Health Med* 2012; 18:  
46  
47 515 61-66.  
48  
49  
50 516 19. Goodenough B, Low LF, Casey AN, et al. Study protocol for a  
51  
52 517 randomized controlled trial of humor therapy in residential care: the  
53  
54 518 Sydney Multisite Intervention of LaughterBosses and ElderClowns

- 1  
2  
3  
4  
5 519 (SMILE). *Int Psychogeriatr* 2012; 24: 2037-2044.  
6  
7 520 20. Low LF, Goodenough B, Fletcher J, et al. The effects of humor therapy  
8  
9 521 on nursing home residents measured using observational methods:  
10  
11 522 the SMILE cluster randomized trial. *J Am Med Dir Assoc* 2014; 15:  
12  
13 523 564-569.  
14  
15  
16 524 21. Low LF, Brodaty H, Goodenough B, et al. The Sydney Multisite  
17  
18 525 Intervention of LaughterBosses and ElderClowns (SMILE) study:  
19  
20 526 cluster randomised trial of humour therapy in nursing homes. *BMJ*  
21  
22 527 *Open* 2013; 3; e002072.  
23  
24  
25 528 22. Kagamimori S, Gaina A, Nasermoaddeli A. Socioeconomic status and  
26  
27 529 health in the Japanese population. *Soc Sci Med* 2009; 68: 2152-2160.  
28  
29  
30 530 23. Ahmed D, El Shair IH, Taher E, et al.. Prevalence and predictors of  
31  
32 531 depression and anxiety among the elderly population living in  
33  
34 532 geriatric homes in Cairo, Egypt. *J Egypt Public Health Assoc* 2014; 89:  
35  
36 533 127-135.  
37  
38  
39 534 24. Kahneman D, Deaton A. High income improves evaluation of life but  
40  
41 535 not emotional well-being. *Proc Natl Acad Sci U S A* 2010; 107:  
42  
43 536 16489-16493.  
44  
45  
46 537 25. Kondo K. Kenkokakusasyakai nanigakenkowomushibamunoka.  
47  
48 538 Igakusyoin; 2005 (in Japanese).  
49  
50 539 26. Smoskia M, Bachorowskia JA. Antiphonal laughter between friends  
51  
52 540 and strangers. *Cognition and Emotion* 2010; 17: 327-340.  
53  
54  
55 541 27. Lim LL, Kua EH. Living alone, loneliness, and psychological  
56  
57  
58  
59  
60

- 1  
2  
3  
4  
5 542 well-being of older persons in singapore. *Curr Gerontol Geriatr Res*  
6  
7 543 2011; 673181.  
8  
9 544 28. Hayashi K, Kawachi I, Ohira T, et al. Laughter and Subjective Health  
10  
11 545 Among Community-Dwelling Older People in Japan: Cross-Sectional  
12  
13 546 Analysis of the Japan Gerontological Evaluation Study Cohort Data. *J*  
14  
15 547 *Nerv Ment Dis* 2015; 203: 934-942.  
16  
17  
18 548 29. Koyano W, Shibata H, Nakazato K, et al.. Measurement of  
19  
20 549 competence: reliability and validity of the TMIG Index of Competence.  
21  
22 550 *Arch Gerontol Geriatr* 1991; 13: 103-116.  
23  
24  
25 551 30. Wada T, Ishine M, Kita T, et al. Depression screening of elderly  
26  
27 552 community-dwelling Japanese. *J Am Geriatr Soc* 2003; 51: 1328-1329.  
28  
29  
30 553 31. Burke WJ, Roccaforte WH, Wengel SP. The short form of the Geriatric  
31  
32 554 Depression Scale: a comparison with the 30-item form. *J Geriatr*  
33  
34 555 *Psychiatry Neurol* 1991; 4: 173-178.  
35  
36  
37 556 32. Murata C, Kondo K, Hirai H, et al. Association between depression  
38  
39 557 and socio-economic status among community-dwelling elderly in  
40  
41 558 Japan: the Aichi Gerontological Evaluation Study (AGES). *Health*  
42  
43 559 *Place* 2007; 14: 406-414.  
44  
45  
46 560 33. Schreiner AS, Hayakawa H, Morimoto T, et al. Screening for late life  
47  
48 561 depression: cut-off scores for the Geriatric Depression Scale and the  
49  
50 562 Cornell Scale for Depression in Dementia among Japanese subjects.  
51  
52 563 *Int J Geriatr Psychiatry* 2003; 18: 498-505.  
53  
54  
55 564 34. Spiegelman D, Hertzmark E. Easy SAS calculations for risk or



- 1  
2  
3  
4  
5 565 prevalence ratios and differences. *Am J Epidemiol* 2005; 162: 199-200.  
6  
7 566 35. Navarro J, del Moral R, Alonso MF, et al. Validation of laughter for  
8  
9 567 diagnosis and evaluation of depression. *J Affect Disord* 2014; 160:  
10  
11 568 43-49.  
12  
13  
14 569 36. Quesnel-Vallee A, Taylor M. Socioeconomic pathways to depressive  
15  
16 570 symptoms in adulthood: evidence from the National Longitudinal  
17  
18 571 Survey of Youth 1979. *Soc Sci Med* 2012; 74: 734-743.  
19  
20  
21 572 37. Oda T. Some Considerations about Friendship of Elderly Japanese  
22  
23 573 Living in an Urban Area. *Bulletin of Graduate School of Human*  
24  
25 574 *Development and Environment, Kobe University* 2003; 10: 491-502 (in  
26  
27 575 Japanese).  
28  
29  
30 576 38. Okabayashi H, Hougham GW. Gender differences of social  
31  
32 577 interactions and their effects on subjective well-being among Japanese  
33  
34 578 elders. *Aging Ment Health* 2014; 18: 59-71.  
35  
36  
37 579 39. Litwin H, Shiovitz-Ezra S. Social network type and subjective  
38  
39 580 well-being in a national sample of older Americans. *Gerontologist*  
40  
41 581 2011; 51: 379-388.  
42  
43  
44 582 40. Saito M, Kondo N, Kondo K, et al. Gender differences on the impacts  
45  
46 583 of social exclusion on mortality among older Japanese: AGES cohort  
47  
48 584 study. *Soc Sci Med* 2012; 75: 940-945.  
49  
50  
51 585 41. Larson R. Thirty years of research on the subjective well-being of older  
52  
53 586 americans. *J Gerontol* 1978; 33: 109-125.  
54  
55 587 42. House JS. Social Support and Social Structure. *Sociological Forum*  
56  
57  
58  
59

1  
2  
3  
4  
5 588 1987; 2: 135-146.

6  
7 589 43. Kashiwagi K, Hirayama J. Marital norm, reality and satisfaction in  
8  
9 590 middle-aged couples: why are wives less satisfied than husbands?.  
10  
11 591 *Shinrigaku Kenkyu* 2003; 74: 122-130 (in Japanese).

12  
13  
14 592 44. Shimizu A. Laughter, the brain, and psychiatric diseases. *Seishin*  
15  
16 593 *Shinkeigaku Zasshi* 2001; 103: 895-903 (in Japanese).

17  
18 594

19  
20 595

21  
22  
23 596 **Figure legend**

24  
25 597 Figure 1. Adjusted Prevalence Ratios (PRs) for laughing almost every day  
26  
27 598 in each group according to equivalized income and frequency of meeting  
28  
29 599 friends in men (a) and women (b) were calculated using binomial  
30  
31 600 regression analysis. PRs are adjusted for age (5-year category),  
32  
33 601 instrumental activity of daily living (IADL; independent, not independent,  
34  
35 602 missing), depression (no depression, depression, missing). The lowest  
36  
37 603 equivalized income and meeting friends less frequently category was set  
38  
39 604 as the reference category.

40  
41 605

42  
43  
44 606 Figure 2. Adjusted Prevalence Ratios (PRs) for laughing almost every day  
45  
46 607 in each group according to equivalized income and number of social  
47  
48 608 groups in men (a) and women (b) were calculated using binomial  
49  
50 609 regression analysis. PRs are adjusted for age (5-year category),  
51  
52 610 instrumental activity of daily living (IADL; independent, not independent,  
53  
54  
55  
56  
57  
58  
59  
60

1  
2  
3  
4  
5 611 missing), depression (no depression, depression, missing). The lowest  
6  
7 612 equivalized income and non-participation in social group category was set  
8  
9 613 as the reference category.  
10

11  
12 614

13  
14 615 Figure 3. Adjusted Prevalence Ratios (PRs) for laughing almost every day in  
15  
16 616 each group according to equivalized income and family structure in men (a)  
17  
18 617 and women (b) were calculated using binomial regression analysis. PRs are  
19  
20 618 adjusted for age (5-year category), instrumental activity of daily living  
21  
22 619 (IADL; independent, not independent, missing), depression (no depression,  
23  
24 620 depression, missing). The lowest equivalized income and living alone  
25  
26 621 category was set as the reference category.  
27  
28  
29  
30  
31  
32  
33  
34  
35  
36  
37  
38  
39  
40  
41  
42  
43  
44  
45  
46  
47  
48  
49  
50  
51  
52  
53  
54  
55  
56  
57  
58  
59  
60

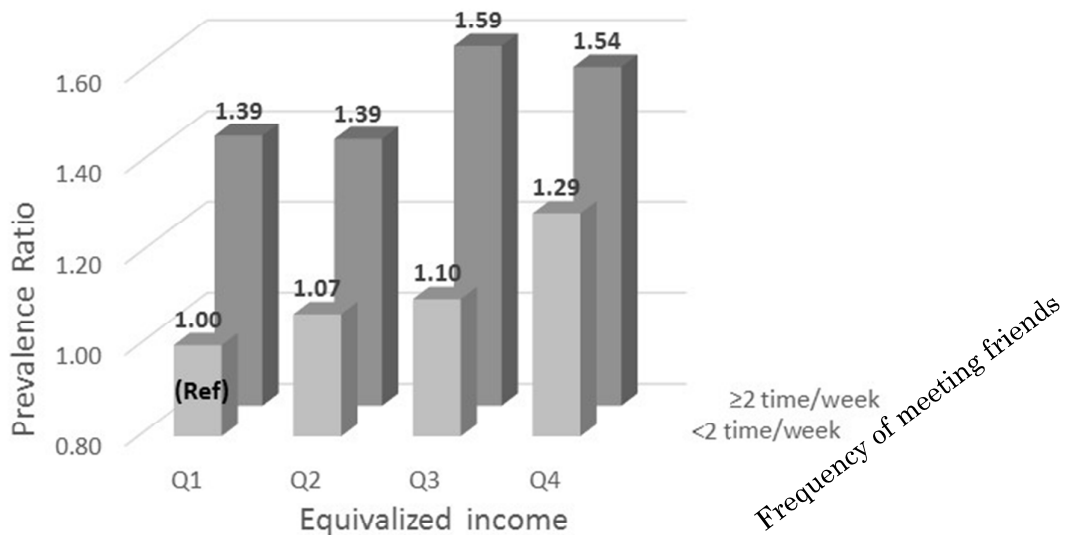

Figure1-a

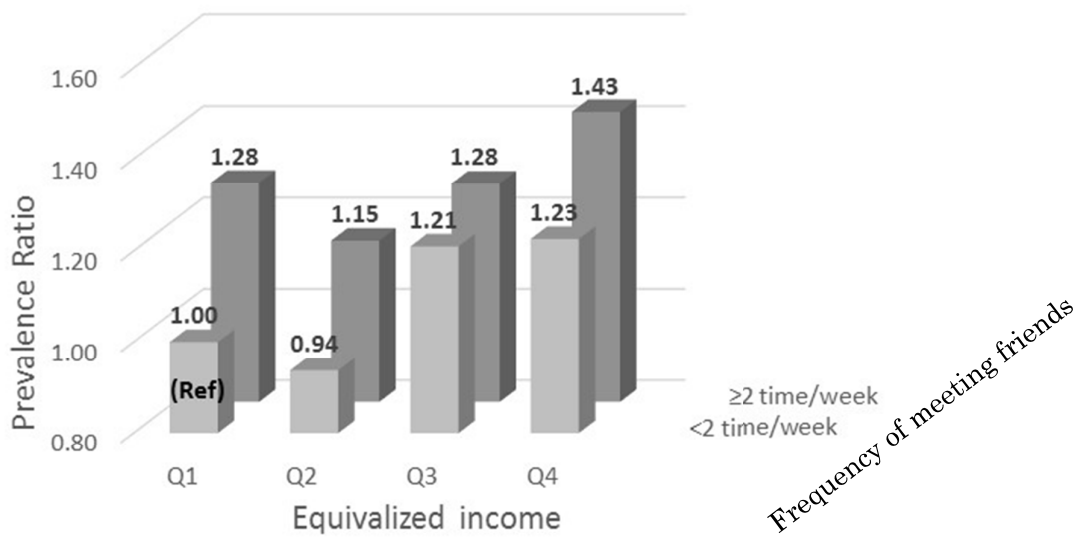

Figure1-b

1  
2  
3  
4  
5  
6  
7  
8  
9  
10  
11  
12  
13  
14  
15  
16  
17  
18  
19  
20  
21  
22  
23  
24  
25  
26  
27  
28  
29  
30  
31  
32  
33  
34  
35  
36  
37  
38  
39  
40  
41  
42  
43  
44  
45  
46  
47  
48  
49  
50  
51  
52  
53  
54  
55  
56  
57  
58  
59  
60

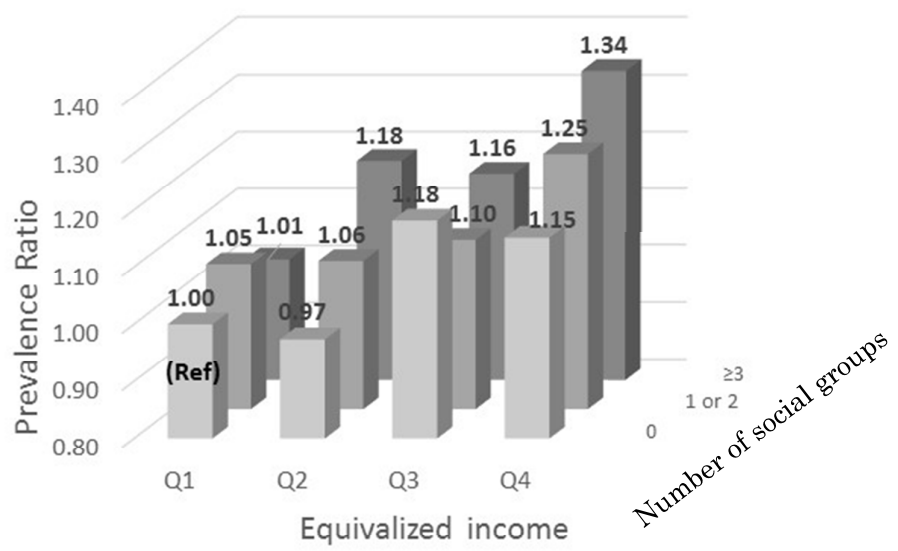

Figure2-a

re

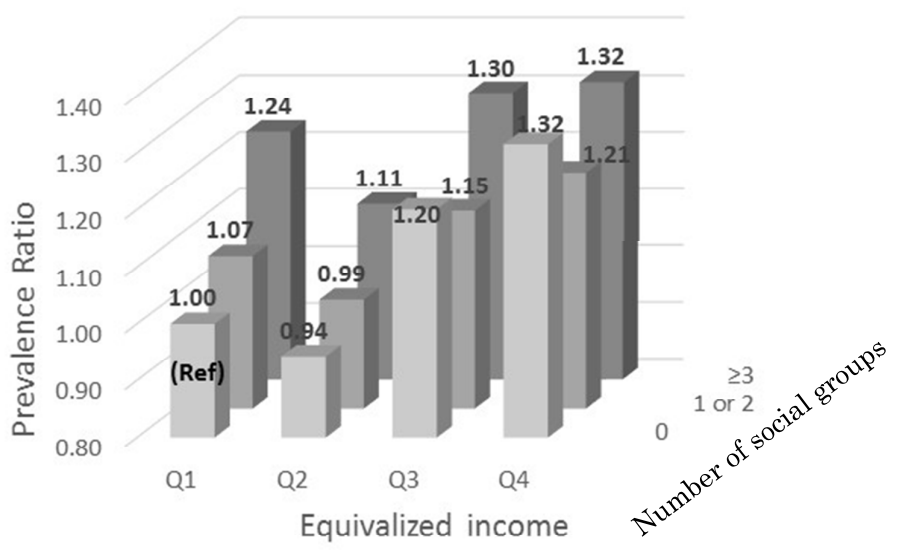

Figure2-b

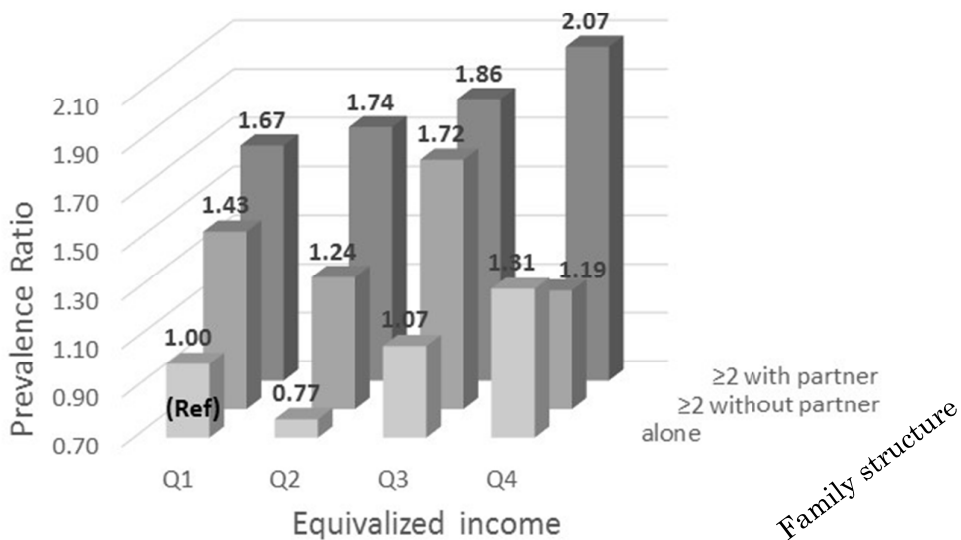

Figure3-a

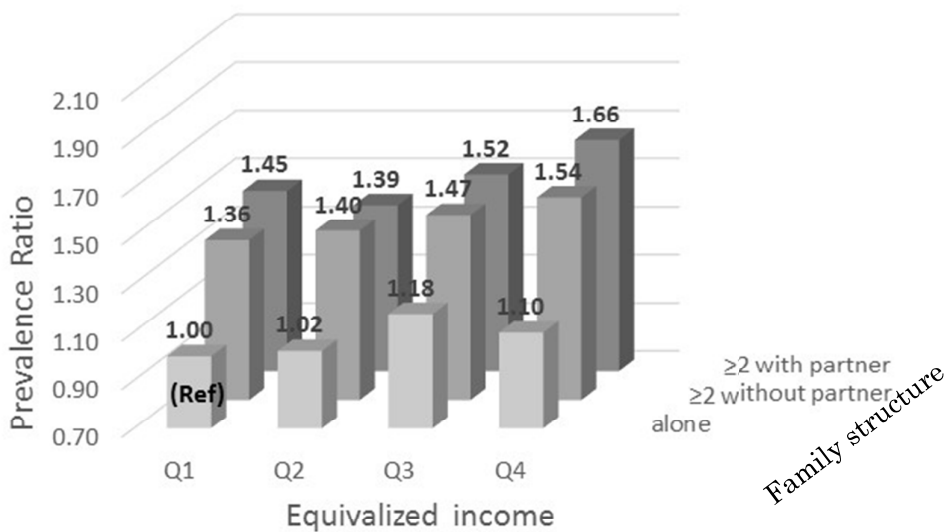

Figure3-b

**STROBE 2007 (v4) Statement—Checklist of items that should be included in reports of *cross-sectional studies***

| Section/Topic             | Item # | Recommendation                                                                                                                                                                       | Reported on page # |
|---------------------------|--------|--------------------------------------------------------------------------------------------------------------------------------------------------------------------------------------|--------------------|
| <b>Title and abstract</b> | 1      | (a) Indicate the study’s design with a commonly used term in the title or the abstract                                                                                               | 1                  |
|                           |        | (b) Provide in the abstract an informative and balanced summary of what was done and what was found                                                                                  | 4                  |
| <b>Introduction</b>       |        |                                                                                                                                                                                      |                    |
| Background/rationale      | 2      | Explain the scientific background and rationale for the investigation being reported                                                                                                 | 5-6                |
| Objectives                | 3      | State specific objectives, including any prespecified hypotheses                                                                                                                     | 6                  |
| <b>Methods</b>            |        |                                                                                                                                                                                      |                    |
| Study design              | 4      | Present key elements of study design early in the paper                                                                                                                              | 6                  |
| Setting                   | 5      | Describe the setting, locations, and relevant dates, including periods of recruitment, exposure, follow-up, and data collection                                                      | 7-8                |
| Participants              | 6      | (a) Give the eligibility criteria, and the sources and methods of selection of participants                                                                                          | 7                  |
| Variables                 | 7      | Clearly define all outcomes, exposures, predictors, potential confounders, and effect modifiers. Give diagnostic criteria, if applicable                                             | 8                  |
| Data sources/ measurement | 8*     | For each variable of interest, give sources of data and details of methods of assessment (measurement). Describe comparability of assessment methods if there is more than one group | 8                  |
| Bias                      | 9      | Describe any efforts to address potential sources of bias                                                                                                                            | 10-11              |
| Study size                | 10     | Explain how the study size was arrived at                                                                                                                                            | 10-11              |
| Quantitative variables    | 11     | Explain how quantitative variables were handled in the analyses. If applicable, describe which groupings were chosen and why                                                         | 10-11              |
| Statistical methods       | 12     | (a) Describe all statistical methods, including those used to control for confounding                                                                                                | 8-9                |
|                           |        | (b) Describe any methods used to examine subgroups and interactions                                                                                                                  | 10-11              |
|                           |        | (c) Explain how missing data were addressed                                                                                                                                          | 10                 |
|                           |        | (d) If applicable, describe analytical methods taking account of sampling strategy                                                                                                   |                    |
|                           |        | (e) Describe any sensitivity analyses                                                                                                                                                | 10                 |
| <b>Results</b>            |        |                                                                                                                                                                                      |                    |

|                          |     |                                                                                                                                                                                                              |       |
|--------------------------|-----|--------------------------------------------------------------------------------------------------------------------------------------------------------------------------------------------------------------|-------|
| Participants             | 13* | (a) Report numbers of individuals at each stage of study—eg numbers potentially eligible, examined for eligibility, confirmed eligible, included in the study, completing follow-up, and analysed            | 7     |
|                          |     | (b) Give reasons for non-participation at each stage                                                                                                                                                         | 7     |
|                          |     | (c) Consider use of a flow diagram                                                                                                                                                                           |       |
| Descriptive data         | 14* | (a) Give characteristics of study participants (eg demographic, clinical, social) and information on exposures and potential confounders                                                                     | 7-11  |
|                          |     | (b) Indicate number of participants with missing data for each variable of interest                                                                                                                          | 12-13 |
| Outcome data             | 15* | Report numbers of outcome events or summary measures                                                                                                                                                         | 12-13 |
| Main results             | 16  | (a) Give unadjusted estimates and, if applicable, confounder-adjusted estimates and their precision (eg, 95% confidence interval). Make clear which confounders were adjusted for and why they were included | 15    |
|                          |     | (b) Report category boundaries when continuous variables were categorized                                                                                                                                    | 8     |
|                          |     | (c) If relevant, consider translating estimates of relative risk into absolute risk for a meaningful time period                                                                                             |       |
| Other analyses           | 17  | Report other analyses done—eg analyses of subgroups and interactions, and sensitivity analyses                                                                                                               | 17-19 |
| <b>Discussion</b>        |     |                                                                                                                                                                                                              |       |
| Key results              | 18  | Summarise key results with reference to study objectives                                                                                                                                                     | 19    |
| Limitations              | 19  | Discuss limitations of the study, taking into account sources of potential bias or imprecision. Discuss both direction and magnitude of any potential bias                                                   | 22-23 |
| Interpretation           | 20  | Give a cautious overall interpretation of results considering objectives, limitations, multiplicity of analyses, results from similar studies, and other relevant evidence                                   | 19-22 |
| Generalisability         | 21  | Discuss the generalisability (external validity) of the study results                                                                                                                                        |       |
| <b>Other information</b> |     |                                                                                                                                                                                                              |       |
| Funding                  | 22  | Give the source of funding and the role of the funders for the present study and, if applicable, for the original study on which the present article is based                                                | 24    |

\*Give information separately for cases and controls in case-control studies and, if applicable, for exposed and unexposed groups in cohort and cross-sectional studies.

**Note:** An Explanation and Elaboration article discusses each checklist item and gives methodological background and published examples of transparent reporting. The STROBE checklist is best used in conjunction with this article (freely available on the Web sites of PLoS Medicine at <http://www.plosmedicine.org/>, Annals of Internal Medicine at <http://www.annals.org/>, and Epidemiology at <http://www.epidem.com/>). Information on the STROBE Initiative is available at [www.strobe-statement.org](http://www.strobe-statement.org).



# BMJ Open

## The impact of social relationships on income-laughter relationships among older people: The JAGES cross-sectional study

|                                 |                                                                                                                                                                                                                                                                                                                                                                                                                                                                                                                                                                                                                                                                                                                                                                                                                                                       |
|---------------------------------|-------------------------------------------------------------------------------------------------------------------------------------------------------------------------------------------------------------------------------------------------------------------------------------------------------------------------------------------------------------------------------------------------------------------------------------------------------------------------------------------------------------------------------------------------------------------------------------------------------------------------------------------------------------------------------------------------------------------------------------------------------------------------------------------------------------------------------------------------------|
| Journal:                        | <i>BMJ Open</i>                                                                                                                                                                                                                                                                                                                                                                                                                                                                                                                                                                                                                                                                                                                                                                                                                                       |
| Manuscript ID                   | bmjopen-2017-019104.R1                                                                                                                                                                                                                                                                                                                                                                                                                                                                                                                                                                                                                                                                                                                                                                                                                                |
| Article Type:                   | Research                                                                                                                                                                                                                                                                                                                                                                                                                                                                                                                                                                                                                                                                                                                                                                                                                                              |
| Date Submitted by the Author:   | 16-Feb-2018                                                                                                                                                                                                                                                                                                                                                                                                                                                                                                                                                                                                                                                                                                                                                                                                                                           |
| Complete List of Authors:       | Imai, Yurika ; Fukushima Medical University School of Medicine, Department of Epidemiology<br>Nagai, Masato; Tohoku Medical Megabank Organization, Tohoku University; Graduate School of Medicine, Tohoku University<br>Ohira, Tetsuya; Fukushima Medical University, Department of Epidemiology; Fukushima Medical University School of Medicine, Radiation Medical Center for Fukushima Health Management Survey<br>Shirai, Kokoro ; University of the Ryukyus, Department of Human Sciences, School of Law and Letters<br>Kondo, Naoki; The University of Tokyo School of Public Health, Department of Health and Social Behavior<br>Kondo, Katsunori; Chiba University, Center for Preventive Medical Science; Center for Gerontology and Social Science, National Center for Geriatrics and Gerontology, Department of Gerontological Evaluation |
| <b>Primary Subject Heading</b>: | Complementary medicine                                                                                                                                                                                                                                                                                                                                                                                                                                                                                                                                                                                                                                                                                                                                                                                                                                |
| Secondary Subject Heading:      | Epidemiology, Mental health                                                                                                                                                                                                                                                                                                                                                                                                                                                                                                                                                                                                                                                                                                                                                                                                                           |
| Keywords:                       | Japan, Laughter,, Older people, Social relationships, Equivalised income                                                                                                                                                                                                                                                                                                                                                                                                                                                                                                                                                                                                                                                                                                                                                                              |
|                                 |                                                                                                                                                                                                                                                                                                                                                                                                                                                                                                                                                                                                                                                                                                                                                                                                                                                       |

SCHOLARONE™  
Manuscripts

1 **Research**

2 The impact of social relationships on income-laughter relationships among  
3 older people: The JAGES cross-sectional study

4  
5 **Running head:**

6 The impact of social relationships on income-laughter relationships

7  
8 **Keywords:**

9 Equivalised income, Japan, Laughter, Older people, Social relationships

10  
11 **Authors:**

12 Yurika Imai<sup>1</sup>, MD, Masato Nagai, PhD<sup>1, 2, 3</sup>, Tetsuya Ohira, MD, PhD<sup>1,4</sup>,  
13 Kokoro Shirai, PhD<sup>5</sup>, Naoki Kondo, MD, PhD<sup>6</sup>, Katsunori Kondo, MD, PhD<sup>7</sup>,

14 <sup>8</sup>

15  
16 <sup>1</sup> Department of Epidemiology, Fukushima Medical University School of  
17 Medicine, Fukushima, Japan

18 <sup>2</sup> Tohoku Medical Megabank Organization, Tohoku University, Sendai, Japan

19 <sup>3</sup> Graduate School of Medicine, Tohoku University, Sendai, Japan

20 <sup>4</sup> Radiation Medical Science Center for Fukushima Health Management  
21 Survey, Fukushima Medical University, Fukushima, Japan

22 <sup>5</sup> Department of Human Sciences, School of Law and Letters, University of  
23 the Ryukyus, Okinawa, Japan

24 <sup>6</sup> Department of Health and Social Behavior / Department of Health  
25 Education and Health Sociology, School of Public Health, The University of  
26 Tokyo, Tokyo, Japan

27 <sup>7</sup> Center for Preventive Medical Sciences, Chiba University, Chiba, Japan

28 <sup>8</sup> Department of Gerontological Evaluation, Center for Gerontology and  
29 Social Science, National Center for Geriatrics and Gerontology, Aichi, Japan

### 31 **Funding sources**

32 This study was supported by Health Labour Sciences Research Grant,  
33 Comprehensive Research on Aging and Health (H28-Choju-Ippan-002,  
34 H26-Choju-Ippan-006, H25-Choju-Ippan-003, H25-Kenki-Wakate-015,  
35 H25-Irryo-Shitei-003 (Fukkou), H24-Junkanki (Syosyu)-Ippan-007) from the  
36 Ministry of Health, Labour and Welfare, Japan; Grant-in-Aid for Scientific  
37 Research (20319338, 22390400, 23243070, 23590786, 23790710, 24140701,  
38 24390469, 24530698, 24653150, 24683018, 25253052, 25870573 2587881,  
39 15H01972, 15KT0007) from the Japan Society for the Promotion of Science;  
40 the Japan Agency for Medical Research and Development (16769793); and a  
41 grant from the National Center for Geriatrics and Gerontology, Japan (24-17,  
42 24-23, J09KF00804)

### 44 **Corresponding author:**

45 Tetsuya Ohira

46 Department of Epidemiology, Fukushima Medical University School of

1  
2  
3  
4  
5 47 Medicine, Hikarigaoka 1, Fukushima, Fukushima 960-1295, Japan.

6  
7 48 Phone: +81-24-547-1344

8  
9 49 Fax: +81-24-547-1336

10  
11 50 E-mail: teohira@fmu.ac.jp.

12  
13  
14 51

15  
16 52 #Word count: 3,726

17  
18 53 #References: 45

19  
20 54 #Tables: 3

21  
22 55 #Figures: 3

23  
24 56 #Page: 35

25  
26  
27 57

28  
29  
30 58

31  
32 59 **ABSTRACT**

33  
34 60 **Objectives:** Laughter has a positive and quantifiable effect on certain aspects  
35  
36 61 of health, and previous studies have suggested that income influences the  
37  
38 62 emotion. However, it is unknown whether social relationship-related factors  
39  
40 63 modify the association between equivalised income and laughter among  
41  
42 64 older people. In the present study, we examined the relationship between  
43  
44 65 equivalised income and the frequency of laughter. In addition, we examined  
45  
46 66 the impact of social relationship-related factors on the association between  
47  
48 67 equivalised income and frequency of laughter using a cross-sectional study  
49  
50 68 design.

51  
52  
53 69 **Design:** Cross-sectional study and binomial regression analysis.  
54  
55  
56  
57  
58  
59  
60

1  
2  
3  
4  
5 70 **Setting:** We sampled from 30 municipalities in Japan.

6  
7 71 **Participants:** We examined 20,752 non-disabled Japanese individuals aged  $\geq$   
8  
9 72 65 years using data from the Japan Gerontological Evaluation Study.

10  
11 73 **Primary outcome:** Frequency of laughter.

12  
13 74 **Results:** Laughter increased significantly with an increase in equivalent  
14  
15 75 income (P for trend  $< .0001$ ). Prevalence ratios (PRs) for laughing almost  
16  
17 76 every day were calculated according to quartile equivalised income (quartile)  
18  
19 77 after adjusting for age, instrumental activities of daily living (IADL),  
20  
21 78 depression, frequency of meeting friends, number of social groups, and  
22  
23 79 family structure. The results revealed that PRs in Q4 (men;  $\geq$  €24,420,  
24  
25 80 women;  $\geq$  €21,154) were 1.21 (95% confidence interval: 1.13-1.30) among men  
26  
27 81 and 1.14 (1.08-1.20) among women, as compared with Q1 (men;  $<$  €12,041,  
28  
29 82 women;  $<$  €9,518), respectively. After excluding participants with depression,  
30  
31 83 the association remained significant. In addition, we found inadequate social  
32  
33 84 relationships and living alone were associated with a lower frequency of  
34  
35 85 laughter. In comparison with the lowest equivalent income with meeting  
36  
37 86 friends less frequently and living alone, the PRs of the highest equivalent  
38  
39 87 income with meeting friends frequently and living with someone were higher,  
40  
41 88 respectively.  
42  
43  
44  
45  
46

47 89 **Conclusions:** The results revealed a significant relationship between  
48  
49 90 equivalent income and the frequency of laughter. Social relationships and  
50  
51 91 family structure were also associated with the frequency of laughter.

52  
53  
54 92 (300 words)

93

**94 Strengths and limitations of this study:**

- 95 ● This is the first study to investigate relationships among equivalised  
96 income and frequency of laughter, and to examine the impact of social  
97 relationship-related factors on this association.
- 98 ● The present study design was cross-sectional, and thus we cannot  
99 demonstrate causal relationships.
- 100 ● The use of self-reported questionnaires may have introduced reporting  
101 bias regarding income and the frequency of laughter.

102

**103 INTRODUCTION**

104 In most developed countries, the proportion of older people is growing faster  
105 than any other age group. Among these countries, Japan is experiencing the  
106 most rapidly aging population (19.0% in 2003; 26.7% in 2015).<sup>1,2</sup> The need for  
107 health promotion and disease prevention targeting older people is increasing.  
108 Various health promotion strategies have been recommended for older people,  
109 and laughter therapy has been introduced as a potentially important  
110 option.<sup>3-5</sup> Previous studies have suggested that laughter has positive and  
111 quantifiable effects on certain aspects of health, including immune function,<sup>6</sup>  
112 allergic dermatitis,<sup>7-9</sup> cancer,<sup>10,11</sup> psychiatric diseases,<sup>12</sup> dementia,<sup>13</sup> and  
113 cardiovascular diseases.<sup>14</sup> In addition, laughter therapy has been found to  
114 improve various aspects of mental and physical function in older people,<sup>3-5</sup>  
115 and has been incorporated into complementary medicine. For example, a

1  
2  
3  
4  
5 116 randomized controlled trial of humor therapy in residential care called the  
6  
7 117 Sydney Multisite Intervention of Laughter Bosses and Elder Clowns  
8  
9 118 (SMILE)<sup>15</sup> suggested that humor therapy decreased agitation and increased  
10  
11 119 happiness.<sup>16 17</sup>

12  
13  
14 120 Laughter is reported to occur most frequently during casual  
15  
16 121 conversation.<sup>18</sup> Surprise is an important element in humor because laughter  
17  
18 122 usually occurs when one encounters a meaningful interpretation of some  
19  
20 123 stimulus or event that differs from the meaning that was initially assumed.<sup>19</sup>  
21  
22  
23 124 An individual's emotions are influenced by their character and social  
24  
25 125 background, and previous studies have reported that socioeconomic status,  
26  
27 126 particularly income, influences emotions.<sup>20 21</sup> In addition, the threshold  
28  
29 127 association between income and positive emotion (emotional well-being) has  
30  
31 128 been reported.<sup>21</sup> In another study, income was found to have a positive  
32  
33 129 dose-response relationship with positive emotion, up to an annual income of  
34  
35 130 \$75,000, whereas insufficient income was a significant predictor for  
36  
37 131 depression.<sup>20</sup> The proportion of people with depression in the lowest income  
38  
39 132 group is 15.8% among men and 15.0% among women,<sup>22</sup> and depression is 6.9  
40  
41 133 times more prevalent for men and 4.1 times more prevalent for women in  
42  
43 134 this income group than it is in the highest income group among people in  
44  
45 135 Japan aged 65–69 years. Although these findings suggest that emotion  
46  
47 136 varies according to socioeconomic status, no previous studies have  
48  
49 137 demonstrated a relationship between income and the frequency of laughter.  
50  
51  
52  
53

54 138 In the current study, we hypothesized that the frequency of laughter  
55  
56  
57  
58  
59  
60

1  
2  
3  
4  
5 139 would be positively associated with equivalised income. We further  
6  
7 140 hypothesized that social relationships and family structure would modify the  
8  
9 141 association between equivalised income and laughter for older people. Closer  
10  
11 142 personal relationships are associated with more frequent laughter,<sup>23</sup> and  
12  
13 143 living alone has been correlated with reduced psychological well-being.<sup>24</sup>  
14  
15 144 Laughter is not only involved in the expression of emotion, but also in the  
16  
17 145 maintenance of social bonds.<sup>25</sup> In the present study, therefore, we examined  
18  
19 146 the relationship between equivalised income and frequency of laughter. In  
20  
21 147 addition, we examined the impact of social relationship-related factors on  
22  
23 148 this relationship association among men and women aged 65 years and older  
24  
25 149 in Japan.  
26  
27  
28  
29

## 30 150 31 32 151 **METHODS**

### 33 34 152 **Study sample**

35  
36 153 The present study had a cross-sectional design, using data from the Japan  
37  
38 154 Gerontological Evaluation Study (JAGES). The JAGES was designed to  
39  
40 155 describe the health status and social determinants of non-disabled people  
41  
42 156 aged 65 years and older, sampled from 30 municipalities in Japan. We used  
43  
44 157 the 2013 wave of JAGES, which was obtained from self-reported  
45  
46 158 questionnaires mailed to a source population of 195,290 community-dwelling  
47  
48 159 individuals between 1 October and 2 December 2013. These individuals were  
49  
50 160 65 years and older, and were not eligible to receive benefits from public  
51  
52 161 long-term care insurance services. Of this sample, 138,293 individuals  
53  
54  
55  
56  
57  
58  
59  
60



1  
2  
3  
4  
5 162 responded to the survey (response rate = 70.8%). In addition to basic  
6  
7 163 questions, there were five modules in the survey covering different topics<sup>26</sup>  
8  
9 164 —module A: nursing care, medical care, and lifestyles; module B: oral  
10  
11 165 hygiene, optimism, subjective health; module C: social capital, history of  
12  
13 166 abuse; module D: subjective quality of life, sleep, cognitive function; and  
14  
15 167 module E: physical activity. We examined data from module B, which  
16  
17 168 included questions about laughter. Of the 138,293 respondents, the current  
18  
19 169 study examined the data of 26,368 individuals who responded to the JAGES  
20  
21 170 basic questions as well as module B, including questions about the frequency  
22  
23 171 of laughter. The final analysis involved 20,006 participants (9,912 men and  
24  
25 172 10,094 women), after excluding 6,362 participants with missing information  
26  
27 173 about the frequency of laughter (n = 1,306), annual household income (n =  
28  
29 174 3,386), or the number of people living together (n = 1,670).

30  
31  
32  
33  
34 175 The JAGES protocol was reviewed and approved by the Ethics  
35  
36 176 Committee on Research of Human Subjects at Nihon Fukushi University  
37  
38 177 (Approval No. 10-05). Written informed consent was assumed with voluntary  
39  
40 178 return of the questionnaire.  
41  
42  
43  
44

## 45 180 **Laughter**

46  
47 181 The outcome variable was the frequency of laughing. Laughter was assessed  
48  
49 182 through each participant's response to a question about how frequently they  
50  
51 183 laughed out loud during their daily life. The possible item answers were:  
52  
53 184 almost every day, 1–5 days/week, 1–3 days/month, and < 1 day/month. Based  
54  
55  
56  
57  
58  
59  
60

1  
2  
3  
4  
5 185 on a previous study<sup>14</sup>, we defined participants as laughing often if they  
6  
7 186 answered “almost every day.”  
8

9  
10 187

### 11 188 **Equivalised income**

12  
13  
14 189 Equivalised income was calculated by dividing the median value of the  
15  
16 190 multiple-choice annual household income by the square root of the number of  
17  
18 191 people living together. The annual household income question had 15  
19  
20 192 categories (< 0.5, 0.5–1.0, 1.0–1.5, 1.5–2.0, 2.0–2.5, 2.5–3.0, 3.0–4.0, 4.0–5.0,  
21  
22 193 5.0–6.0, 6.0–7.0, 7.0–8.0, 8.0–9.0, 9.0–10.0, 10.0–12.0, and ≥ 12.0 million  
23  
24 194 Japanese yen). We used a purchasing power parity rate of EUR€1.00 =  
25  
26 195 JPN¥130 (as of July 2017). We divided the participants into quartiles  
27  
28 196 according to their equivalised income: Q1 (men < €12,041; women < €9,518),  
29  
30 197 Q2 (men €12,041–€15,543; women €9,518–€14,957), Q3 (men €15,544–  
31  
32 198 €24,426; women €14,958–€21,153), and Q4 (men ≥ €24,420; women ≥  
33  
34 199 €21,154).  
35  
36  
37  
38

39 200

### 40 201 **Measures and definitions**

41  
42 202 Instrumental activities of daily living (IADL) were assessed using the Tokyo  
43  
44 203 Metropolitan Institute of Gerontology Index of Competence,<sup>27</sup> and the results  
45  
46 204 were classified as high IADL (5 points) or low IADL (≤ 4 points). The  
47  
48 205 evaluation of depression was made using the Geriatric Depression Scale  
49  
50 206 (GDS).<sup>28</sup> The GDS is a 15-item questionnaire, with a score range of 1–15.<sup>29</sup> In  
51  
52 207 accord with previous studies,<sup>30 31</sup> participants were classified into two  
53  
54  
55  
56  
57  
58  
59  
60

1  
2  
3  
4  
5 208 groups: not depressed (GDS < 5) and depressed (GDS ≥ 5).  
6

7 209 The frequency of meeting friends and acquaintances was measured  
8  
9 210 with a question comprising six categories (≥ 4 days/week, 2–3 days/week, 1  
10  
11 211 day/week, 1–3 days/month, several times/year, and none). We divided the  
12  
13  
14 212 respondents into three groups: < 2 times/week, ≥ 2 times/week, or missing.  
15

16 213 Participants were also presented with 14 different civic associations  
17  
18 214 and social groups, and asked which ones they were regularly involved with.  
19  
20 215 This provided a measurement, divided into six categories, for each type of  
21  
22 216 social group (≥ 4 days/week, 2–3 days/week, 1 day/week, 1–3 days/month,  
23  
24 217 several times/year, no participation). The total number of types of groups in  
25  
26 218 which each respondent participated at least several times per year was  
27  
28 219 tallied, and respondents were divided into four groups: 0, 1 or 2, ≥ 3, or  
29  
30 220 missing.  
31  
32  
33

34 221 Family structure was assessed through two questions: one regarding  
35  
36 222 the number of people living together, and the other regarding marital status.  
37  
38 223 The marital status question provided five answer categories (married,  
39  
40 224 bereaved, divorced, never married, and other). Based on the responses to  
41  
42 225 these questions, we divided participants into four groups: alone, ≥ 2 without  
43  
44 226 partner, ≥ 2 with partner, or ≥ 2 with no information about marital status.  
45  
46  
47

48 227

## 49 228 **Statistical analysis**

50  
51 229 We used binomial regression analyses to derive prevalence ratios (PRs)  
52  
53 230 based on 95% confidence intervals (CIs) for “laughing almost every day”  
54  
55  
56  
57  
58  
59  
60

1  
2  
3  
4  
5 231 according to equivalised income. In accord with recent statistical  
6  
7 232 recommendations, we calculated PRs rather than odds ratios because the  
8  
9 233 prevalence of laughing almost every day was not rare ( $\geq 10\%$ ).<sup>32</sup> We used the  
10  
11 234 SAS version 9.4 statistical software package. In each model, the lowest  
12  
13  
14 235 equivalised income category was set as the reference category. A “missing”  
15  
16 236 category was used in analysis to account for missing values in response to  
17  
18 237 questions. In Model 1, we controlled for age (65–69, 70–74, 75–79, 80–84,  $\geq$   
19  
20 238 85 years), IADL (high IADL, low IADL, or missing), and depression (no  
21  
22 239 depression, depression, or missing). Model 2 was adjusted for the covariates  
23  
24  
25 240 in Model 1 plus social relationship-related factors such as the frequency of  
26  
27 241 meeting friends (< 2 times/week,  $\geq 2$  times/week, or missing) and number of  
28  
29 242 social groups (0, 1 or 2,  $\geq 3$ , or missing), and family structure (alone,  $\geq 2$   
30  
31 243 without partner,  $\geq 2$  with partner, or  $\geq 2$  with n60 information about marital  
32  
33 244 status). Additionally, to confirm the robustness of our results we also carried  
34  
35 245 out the same series of analyses using the sample excluding subjects with  
36  
37 246 depression (GDS  $\geq 5$ ) and missing information about depression. It should be  
38  
39 247 noted that the results in this study design may be affected by bias related to  
40  
41 248 depression because people with depression might seldom laugh and  
42  
43 249 depression influences employment and income.  
44  
45  
46  
47

48 250 To assess whether the prevalence of laughter associated with  
49  
50 251 equivalised income differed between social relationships (frequency of  
51  
52 252 meeting friends or number of social groups) or family structure, we  
53  
54 253 conducted an analysis in which participants were cross-classified into groups  
55  
56  
57  
58  
59  
60

254 according to their equivalised income. The lowest equivalised income group  
 255 was treated with each inadequate social relationship (meeting friends less  
 256 frequently or non-participation in an organization) or living alone as  
 257 reference categories. The *p* value for the trend was calculated by categorical  
 258 variables conducted from binomial regression model adjusting above  
 259 covariates. All *p* values were two-tailed, and differences of < 0.05 were  
 260 accepted as statistically significant.

261

## 262 RESULTS

### 263 Baseline characteristics by equivalised income

264 Table 1 shows the baseline characteristics of the study participants  
 265 according to the categories of equivalised income. The proportions for  
 266 laughing almost every day were 37.2% for men and 47.6% for women; these  
 267 proportions increased as equivalised income increased for both men and  
 268 women. The proportion of respondents who reported laughing < 1  
 269 time/month was 9.7% for men and 5.3% for women. The mean age was  
 270 highest in the lowest equivalised income group for both men and women. The  
 271 proportion of low IADL and depression decreased as equivalised income  
 272 increased. Meeting friends and participating in social groups increased with  
 273 a rise in equivalised income. The proportion of people co-habiting was  
 274 highest in Q2 for men and in Q3 for women.

Table 1. Baseline characteristics by categories of household income

|  | Equivalised income* |    |    |    | <i>p</i> value <sup>†</sup> |
|--|---------------------|----|----|----|-----------------------------|
|  | Q1                  | Q2 | Q3 | Q4 |                             |

| Men                                         |            |            |            |            |         |
|---------------------------------------------|------------|------------|------------|------------|---------|
| Number of participants                      | 2628       | 2454       | 2739       | 2480       |         |
| Frequency of laughing (%)                   |            |            |            |            |         |
| Almost everyday                             | 30.9       | 35.3       | 38.7       | 44.2       | <0.0001 |
| 1-5 times/week                              | 37.6       | 38.7       | 39.0       | 37.4       |         |
| 1-3 times/month                             | 16.7       | 16.5       | 14.3       | 12.0       |         |
| <1 time/month                               | 14.8       | 9.6        | 8.0        | 6.4        |         |
| Age (years) (%)                             |            |            |            |            |         |
| 65-69                                       | 24.5       | 30.2       | 32.3       | 36.8       | <0.0001 |
| 70-74                                       | 29.9       | 31.3       | 31.0       | 28.9       |         |
| 75-80                                       | 25.5       | 23.4       | 19.8       | 17.8       |         |
| 80-85                                       | 14.3       | 10.8       | 12.0       | 11.4       |         |
| ≥85                                         | 5.9        | 4.3        | 5.0        | 5.1        |         |
| Mean age (years) (SD <sup>‡</sup> )         | 74.3 (6.0) | 73.3 (5.8) | 73.2 (6.0) | 72.8 (6.1) | <0.0001 |
| IADL <sup>‡</sup> (%)                       |            |            |            |            |         |
| High IADL                                   | 64.7       | 74.0       | 77.1       | 77.6       | <0.0001 |
| Low IADL                                    | 30.0       | 22.9       | 20.0       | 20.5       |         |
| Missing                                     | 5.4        | 3.1        | 2.9        | 1.9        |         |
| Frequency of meeting friends (%)            |            |            |            |            |         |
| <2 time/week                                | 67.2       | 68.3       | 68.2       | 62.8       | <0.0001 |
| ≥2 time/week                                | 27.6       | 28.0       | 28.7       | 34.5       |         |
| Missing                                     | 5.3        | 3.8        | 3.2        | 2.7        |         |
| Number of social groups (%)                 |            |            |            |            |         |
| 0                                           | 29.0       | 22.9       | 21.1       | 19.1       | <0.0001 |
| 1 or 2                                      | 25.3       | 27.4       | 29.5       | 28.1       |         |
| ≥3                                          | 30.2       | 36.8       | 38.8       | 42.6       |         |
| Missing                                     | 15.5       | 12.9       | 10.7       | 10.2       |         |
| Family structure (%)                        |            |            |            |            |         |
| Alone                                       | 10.5       | 6.4        | 8.9        | 6.7        | <0.0001 |
| ≥2 without partner                          | 7.5        | 4.7        | 4.1        | 4.9        |         |
| ≥2 with partner                             | 79.5       | 88.2       | 86.7       | 88.1       |         |
| ≥2 with no information about marital status | 2.6        | 0.6        | 0.3        | 0.3        |         |
| Depression (%)                              |            |            |            |            |         |
| No depression                               | 49.3       | 64.7       | 71.5       | 78.4       | <0.0001 |
| Depression                                  | 35.8       | 24.5       | 19.5       | 13.5       |         |
| Missing                                     | 14.9       | 10.9       | 9.0        | 8.2        |         |

275

(Cont Table 1)

Equivalised income

| Q1 | Q2 | Q3 | Q4 | <i>p</i> value |
|----|----|----|----|----------------|
|----|----|----|----|----------------|

|    |                                             |           |           |           |           |         |
|----|---------------------------------------------|-----------|-----------|-----------|-----------|---------|
| 1  |                                             |           |           |           |           |         |
| 2  |                                             |           |           |           |           |         |
| 3  |                                             |           |           |           |           |         |
| 4  |                                             |           |           |           |           |         |
| 5  | Women                                       |           |           |           |           |         |
| 6  | Number of participants                      | 2688      | 2169      | 2863      | 2731      |         |
| 7  | Frequency of laughing (%)                   |           |           |           |           |         |
| 8  | Almost everyday                             | 41.9      | 40.5      | 51.1      | 55.2      | <0.0001 |
| 9  | 1-5 times/week                              | 38.0      | 41.0      | 37.9      | 35.1      |         |
| 10 | 1-3 times/month                             | 11.4      | 12.2      | 7.7       | 6.6       |         |
| 11 | <1 time/month                               | 8.7       | 6.3       | 3.4       | 3.1       |         |
| 12 | Age (years) (%)                             |           |           |           |           |         |
| 13 | 65-69                                       | 23.0      | 28.3      | 33.7      | 34.5      | <0.0001 |
| 14 | 70-74                                       | 30.4      | 31.2      | 32.3      | 29.6      |         |
| 15 | 75-80                                       | 25.3      | 21.5      | 20.8      | 17.7      |         |
| 16 | 80-85                                       | 14.5      | 13.1      | 9.4       | 12.5      |         |
| 17 | ≥85                                         | 6.9       | 5.9       | 3.8       | 5.8       |         |
| 18 | Mean age (years) (SD)                       | 74.6(6.1) | 73.8(6.0) | 72.8(5.7) | 73.2(6.3) | <0.0001 |
| 19 | IADL (%)                                    |           |           |           |           |         |
| 20 | High IADL                                   | 80.7      | 86.7      | 90.3      | 88.4      | <0.0001 |
| 21 | Low IADL                                    | 15.1      | 10.5      | 7.7       | 9.0       |         |
| 22 | Missing                                     | 4.3       | 2.8       | 2.0       | 2.7       |         |
| 23 | Frequency of meeting friends (%)            |           |           |           |           |         |
| 24 | <2 time/week                                | 53.5      | 55.2      | 54.4      | 54.0      | <0.0001 |
| 25 | ≥2 time/week                                | 40.0      | 40.6      | 42.3      | 43.4      |         |
| 26 | Missing                                     | 6.5       | 4.2       | 3.3       | 2.7       |         |
| 27 | Number of social groups (%)                 |           |           |           |           |         |
| 28 | 0                                           | 26.1      | 23.1      | 18.6      | 19.4      | <0.0001 |
| 29 | 1 or 2                                      | 25.7      | 26.1      | 28.9      | 26.9      |         |
| 30 | ≥3                                          | 25.6      | 34.1      | 38.8      | 41.8      |         |
| 31 | Missing                                     | 22.7      | 16.7      | 13.7      | 11.9      |         |
| 32 | Family structure (%)                        |           |           |           |           |         |
| 33 | Alone                                       | 17.6      | 39.5      | 9.8       | 11.4      | <0.0001 |
| 34 | ≥2 without partner                          | 27.1      | 12.3      | 15.3      | 22.6      |         |
| 35 | ≥2 with partner                             | 51.8      | 47.2      | 74.2      | 65.4      |         |
| 36 | ≥2 with no information about marital status | 3.5       | 1.1       | 0.7       | 0.6       |         |
| 37 | Depression (%)                              |           |           |           |           |         |
| 38 | No depression                               | 52.0      | 57.3      | 68.2      | 73.0      | <0.0001 |
| 39 | Depression                                  | 28.1      | 24.9      | 17.5      | 13.6      |         |
| 40 | Missing                                     | 19.9      | 17.9      | 14.3      | 13.5      |         |

\* Q1 (men; <€12,041, women; <€9,518), Q2 (men; €12,041-€15,543, women; €9,518-€14,957), Q3 (men; €15,544-€24,426, women; €14,958-€21,153), Q4 (men; ≥€24,427, women; ≥€21,154).

† *p* values were calculated by chi-squared test (categorical variables), or ANOVA (continuous variables).

‡ SD, standard deviation; IADL, instrumental activities of daily living.

## 276 **Equivalised income and frequency of laughter**

277 Table 2 shows the results of our binomial regression models for frequency of

1  
2  
3  
4  
5 278 laughter according to equivalised income. Equivalised income was  
6  
7 279 significantly associated with frequency of laughter among both men and  
8  
9 280 women. The PRs tended to become greater as equivalised income increased.  
10  
11 281 Compared with those in the lowest equivalised income group, the  
12  
13 282 age-adjusted PRs for laughing almost every day for participants in the  
14  
15 283 highest equivalised income group were greater: 1.43 (95% CI, 1.33–1.54) for  
16  
17 284 men, and 1.30 (1.23–1.38) for women. After adjusting for age, IADL,  
18  
19 285 depression, frequency of meeting friends, number of social groups, and  
20  
21 286 family structure, the PRs decreased to 1.21 for men and 1.14 for women in  
22  
23 287 this group; however, the association remained significant.  
24  
25  
26  
27  
28  
29  
30  
31  
32  
33  
34  
35  
36  
37  
38  
39  
40  
41  
42  
43  
44  
45  
46  
47  
48  
49  
50  
51  
52  
53  
54  
55  
56  
57  
58  
59  
60



Table 2. Prevalence ratios and 95% confidence intervals of frequency of laughing according to equivalised income.

|                                              | Equivalised income* |                 |                 |                 | <i>p</i> for trend <sup>†</sup> |
|----------------------------------------------|---------------------|-----------------|-----------------|-----------------|---------------------------------|
|                                              | Q1                  | Q2              | Q3              | Q4              |                                 |
| <b>Men</b>                                   |                     |                 |                 |                 |                                 |
| No. of participants                          | 2628                | 2454            | 2739            | 2480            |                                 |
| No. of participants laughing almost everyday | 812                 | 866             | 1060            | 1096            |                                 |
| Crude                                        | reference           | 1.14(1.06-1.24) | 1.25(1.16-1.35) | 1.43(1.33-1.54) | <0.0001                         |
| Age-adjusted                                 | reference           | 1.13(1.05-1.22) | 1.25(1.16-1.34) | 1.43(1.33-1.54) | <0.0001                         |
| Multi-adjusted Model 1 <sup>‡</sup>          | reference           | 1.04(0.96-1.13) | 1.12(1.04-1.21) | 1.24(1.16-1.34) | <0.0001                         |
| Multi-adjusted Model 2 <sup>§</sup>          | reference           | 1.03(0.96-1.11) | 1.12(1.05-1.21) | 1.21(1.13-1.30) | <0.0001                         |
| <b>Women</b>                                 |                     |                 |                 |                 |                                 |
| No. of participants                          | 2688                | 2169            | 2863            | 2731            |                                 |
| No. of participants laughing almost everyday | 1126                | 879             | 1462            | 1507            |                                 |
| Crude                                        | reference           | 0.97(0.90-1.04) | 1.22(1.15-1.29) | 1.32(1.25-1.39) | <0.0001                         |
| Age-adjusted                                 | reference           | 0.96(0.89-1.02) | 1.19(1.13-1.26) | 1.30(1.23-1.38) | <0.0001                         |
| Multi-adjusted Model 1                       | reference           | 0.92(0.86-0.99) | 1.09(1.03-1.15) | 1.16(1.10-1.23) | <0.0001                         |
| Multi-adjusted Model 2                       | reference           | 0.98(0.92-1.05) | 1.06(1.00-1.12) | 1.14(1.08-1.20) | <0.0001                         |

\* Q1 (men; <€12,041, women; <€9,518), Q2 (men; €12,041-€15,543, women; €9,518-€14,957), Q3 (men; €15,544-€24,426, women; €14,958-€21,153), Q4 (men; ≥€24,427, women; ≥€21,154).

<sup>†</sup> *p* for trend was calculated by categorical variables.

<sup>‡</sup> Model 1 is adjusted for age (5-years category), instrumental activities of daily living (independent, not independent, missing), depression (no depression, depression, missing).

<sup>§</sup> Model 2 is adjusted for the covariates in Model 1 plus frequency of meeting friends (<2 time/week, ≥2 time/week, missing), number of social groups (0, 1 or 2, ≥3, missing), family structure (alone, ≥2 without partner, ≥2 with partner, missing).

1  
2  
3  
4  
5 288 Table 3 shows the results of our binomial regression models for  
6  
7 289 frequency of laughter according to equivalised income, using a sample that  
8  
9 290 excluded participants with depression ( $GDS \geq 5$ ) and those for whom  
10  
11 291 information about depression was missing. The associations remained  
12  
13  
14 292 unchanged after excluding these participants. The PRs of laughing almost  
15  
16 293 every day for men and women with the highest equivalised income were 1.23  
17  
18 294 (95% CI, 1.13–1.34) and 1.10 (1.04–1.17), respectively.  
19  
20  
21  
22  
23  
24  
25  
26  
27  
28  
29  
30  
31  
32  
33  
34  
35  
36  
37  
38  
39  
40  
41  
42  
43  
44  
45  
46  
47  
48  
49  
50  
51  
52  
53  
54  
55  
56  
57  
58  
59  
60

Table 3. Prevalence ratios and 95% confidence intervals of frequency of laughing according to equivalised income without depression.

|                                              | Equivalised income <sup>*</sup> |                 |                 |                 | <i>p</i> for trend <sup>†</sup> |
|----------------------------------------------|---------------------------------|-----------------|-----------------|-----------------|---------------------------------|
|                                              | Q1                              | Q2              | Q3              | Q4              |                                 |
| <b>Men</b>                                   |                                 |                 |                 |                 |                                 |
| No. of participants with no depression       | 1296                            | 1587            | 1958            | 1943            |                                 |
| No. of participants laughing almost everyday | 499                             | 634             | 875             | 945             |                                 |
| Multi-adjusted <sup>‡</sup>                  | reference                       | 1.01(0.93-1.11) | 1.15(1.06-1.25) | 1.23(1.13-1.34) | <0.0001                         |
| <b>Women</b>                                 |                                 |                 |                 |                 |                                 |
| No. of participants with no depression       | 1398                            | 1242            | 1953            | 1993            |                                 |
| No. of participants laughing almost everyday | 755                             | 602             | 1122            | 1209            |                                 |
| Multi-adjusted                               | reference                       | 0.94(0.87-1.01) | 1.03(0.97-1.09) | 1.10(1.04-1.17) | <0.0001                         |

<sup>\*</sup> Q1 (men; <€12,041, women; <€9,518), Q2 (men; €12,041-€15,543, women; €9,518-€14,957), Q3 (men; €15,544-€24,426, women; €14,958-€21,153), Q4 (men; ≥€24,427, women; ≥€21,154).

<sup>†</sup> *p* for trend was calculated by categorical variables.

<sup>‡</sup> Prevalence ratios were adjusted for age (5-years category), instrumental activities of daily living (independent, not independent, missing), frequency of meeting friends (<2 time/week, ≥2 time/week, missing), number of social groups (0, 1 or 2, ≥3, missing), family structure (alone, ≥2 without partner, ≥2 with partner, missing).

1  
2  
3  
4  
5 296 **Frequency of laughter according to equivalised income, by social**  
6  
7 297 **relationships and family structures**  
8

9 298 Figure 1, 2, and 3 show the results of the interactions between income and  
10  
11 299 laughing almost every day, by social relationships and family structure.

12  
13  
14 300 While we observed no significant interactions ( $p$  for interaction: frequency of  
15  
16 301 meeting friends = 0.73 for men; number of social groups = 0.20 for men, 0.11  
17  
18 302 for women; family structure = 0.86 for men, 0.52 for women) without  
19  
20  
21 303 frequency of meeting friends in women, we found that inadequate social  
22  
23 304 relationships (particularly when indicated by meeting friends less frequently  
24  
25 305 or living alone) were associated with a lower frequency of laughter. The PR  
26  
27 306 for men in the lowest equivalised income group who met more often with  
28  
29 307 friends was 1.39 (95% CI: 1.24–1.56), while for men in the highest equivalent  
30  
31 308 income group who met less frequently with friends, the PR was 1.29 (1.17–  
32  
33 309 1.42). The PR for women in the lowest equivalised income group who met  
34  
35 310 more often with friends was 1.28 (1.17–1.40), while for women in the highest  
36  
37 311 equivalised income group who met with friends less frequently, the PR was  
38  
39 312 1.23 (1.13–1.33). In terms of family structure, the PR for men in the lowest  
40  
41 313 equivalised income group who lived with  $\geq 2$  people with a partner was 1.67  
42  
43 314 (95% CI: 1.28–2.17), while for men in the highest equivalent income group  
44  
45 315 who lived alone, the PR was 1.31 (0.92–1.87). The PR for women in the  
46  
47 316 lowest equivalised income group who lived with  $\geq 2$  people with a partner was  
48  
49 317 1.45 (1.25–1.68), while for women in the highest equivalised income group  
50  
51 318 who lived alone, the PR was 1.10 (0.90–1.34). Among women, but not men,  
52  
53  
54  
55  
56  
57  
58  
59  
60

1  
2  
3  
4  
5 319 we observed significant associations between equivalised income and the  
6  
7 320 frequency of laughter if the participant had inadequate social relationships,  
8  
9 321 indicated by meeting friends less frequently or non-participation in  
10  
11 322 organizations. However, we observed no statistically significant associations  
12  
13 323 between equivalised income and frequency of laughter if the women had  
14  
15 324 richer social relationships, indicated by meeting friends more frequently or  
16  
17 325 participating in more social groups.  
18  
19  
20  
21  
22  
23  
24

## 25 328 **DISCUSSION**

26  
27 329 The current study examined and described the relationship between  
28  
29 330 equivalised income and the frequency of laughter. In addition, we examined the  
30  
31 331 impact of social relationship-related factors on the association between  
32  
33 332 equivalised income and the frequency of laughter. We found a positive  
34  
35 333 association between equivalised income and frequency of laughter among  
36  
37 334 both men and women. Importantly, this association differed depending on  
38  
39 335 family structure and the frequency of meeting friends. Among women  
40  
41 336 participants, this association was weaker if they met friends frequently or  
42  
43 337 participated in more social groups. However, we did not find a similar trend  
44  
45 338 among participating men. Therefore, social relationships and family  
46  
47 339 structure may modify the association between equivalised income and the  
48  
49 340 frequency of laughter.  
50  
51  
52  
53

54 341 The present study showed an association between equivalised  
55  
56  
57  
58  
59  
60

1  
2  
3  
4  
5 342 income and the frequency of laughter, while previous studies have shown  
6  
7 343 that depression decreases the frequency of laughter<sup>33</sup> and that household  
8  
9 344 income influences mental health.<sup>34</sup> Because our results could potentially  
10  
11 345 have reflected bias related to participant depression, we conducted further  
12  
13 346 analyses after excluding participants with depression. However, this did not  
14  
15 347 change the tendency exhibited in the results. We believe that this result  
16  
17 348 supports the original prediction of this study that the frequency of laughter  
18  
19 349 would be associated with income, regardless of depression.  
20  
21  
22

23 350 Previous studies, however, have indicated that people with more  
24  
25 351 income tend to have more opportunity to come into contact with others.<sup>35</sup>  
26  
27 352 Laughter has been found to occur most frequently during casual  
28  
29 353 conversation.<sup>18</sup> Coming into contact with others is considered to be important  
30  
31 354 to subjective well-being.<sup>36</sup> Thus, it is possible that wealthier people laugh  
32  
33 355 more frequently because they have more opportunities to meet others.  
34  
35 356 Therefore, we examined the influence of social relationship factors and  
36  
37 357 family structure on the relationship between equivalised income and the  
38  
39 358 frequency of laughter.  
40  
41  
42

43 359 In a cross-classification analysis of equivalised income and frequency  
44  
45 360 of meeting friends, we found that meeting friends was associated with  
46  
47 361 frequency of laughter for both men and women. A previous study of older  
48  
49 362 Japanese participants indicated that friendship was important for subjective  
50  
51 363 well-being,<sup>36</sup> in accord with the notion that friendship decreases loneliness  
52  
53 364 and anxiety, and increases happiness.<sup>37</sup> These findings suggest that meeting  
54  
55  
56  
57  
58  
59  
60

1  
2  
3  
4  
5 365 friends leads to more opportunities for laughter.  
6

7 366 In a cross-classification analysis of equivalised income and number of  
8  
9 367 social groups, we observed no significant associations between participating  
10  
11 368 in social groups and the frequency of laughter among men in Q1–3; however,  
12  
13 369 the PRs of men in Q4 tended to become greater as their number of social  
14  
15 370 groups increased. Previous research has suggested that relative poverty  
16  
17 371 might be a risk factor for poor emotional well-being among older men;<sup>38</sup> for  
18  
19 372 an older man, relative poverty had a bigger impact on well-being than social  
20  
21 373 isolation. In the present study, relatively poor men (Q1–3) laughed less  
22  
23 374 frequently regardless of the number of social groups in which they  
24  
25 375 participated. In contrast, PRs were higher for women in wealthier groups  
26  
27 376 (Q3 and Q4) and/or those participating in three or more social groups. For  
28  
29 377 older women, interpersonal relationships might have a strong protective or  
30  
31 378 buffering effect for psychosocial stress.<sup>38</sup> The current results revealed that  
32  
33 379 women with three or more social groups laughed frequently even if they had  
34  
35 380 a low equivalised income. In the evolution of human societies, laughing is  
36  
37 381 thought to function as an essential behavioral mechanism not only for  
38  
39 382 expression of emotion, but also for the maintenance of social bonds.<sup>25</sup> Larson  
40  
41 383 reviewed research from the past 30 years examining the subjective  
42  
43 384 well-being of older Americans,<sup>39</sup> and found a positive correlation between  
44  
45 385 social activity and well-being.  
46  
47  
48  
49  
50  
51

52 386 In our cross-classification analysis on equivalised income and family  
53  
54 387 structure, we found a positive association between the number of family  
55  
56  
57  
58  
59  
60

1  
2  
3  
4  
5 388 members and the frequency of laughter for both men and women. However,  
6  
7 389 for men without a partner, this association was not evident. Particularly for  
8  
9 390 men, the presence of a partner has been found to have a stronger influence  
10  
11 391 than other relationships.<sup>40</sup> The present results revealed that low-income  
12  
13 392 men living with a partner laughed more frequently than unmarried wealthy  
14  
15 393 men. For women, however, living with another person was important for  
16  
17 394 laughter, whether that person was their partner or not. This difference may  
18  
19 395 be related to the finding that women's satisfaction with their partner and  
20  
21 396 their marital relationship is markedly lower than the partner- and marital  
22  
23 397 relationship-related satisfaction of men in Japan.<sup>41</sup> Indeed, we found that  
24  
25 398 factors relating to social relationships were associated with the frequency of  
26  
27 399 laughter. This finding supports our hypothesis that wealthier people laugh  
28  
29 400 more frequently than poorer people because they have more opportunities to  
30  
31 401 come into contact with others.  
32  
33  
34  
35

36 402 The current findings have two main implications for public health.  
37  
38 403 First, given the multiple positive effects of laughing on certain aspects of  
39  
40 404 health,<sup>6-8 10 13-14</sup> income redistribution policies may have additional benefits  
41  
42 405 for impoverished older people. That is, increased income may improve not  
43  
44 406 only material conditions but also psychosocial health and cognitive ability.  
45  
46 407 Second, while income redistribution policy reform may take a long time to  
47  
48 408 implement, public health interventions that provide opportunities for more  
49  
50 409 social interactions in local settings may help reduce the deprivation of  
51  
52 410 laughter among low-income populations.  
53  
54  
55  
56  
57  
58  
59  
60



1  
2  
3  
4  
5 411 To the best of our knowledge, this is the first study to report significant  
6  
7 412 relationships among equivalised income, factors relating to social  
8  
9 413 relationships and family structure, and the frequency of laughter. However,  
10  
11 414 there are several potential limitations that should be considered. First,  
12  
13 415 because the present study design was cross-sectional, we could not  
14  
15 416 demonstrate causal relationships. However, longitudinal analyses of our  
16  
17 417 cohort data can be used to address these issues in future research. Second,  
18  
19 418 the results may have been affected by residual confounders such as the rates  
20  
21 419 of watching television, reading books, or other potential confounding factors  
22  
23 420 for which we did not collect data. Third, it might be that people might not  
24  
25 421 remember frequency of laughter correctly. However, the item of laughter has  
26  
27 422 been used in previous epidemiological studies in Japan.<sup>14 26</sup> The 1-year test–  
28  
29 423 retest reliability of the item was assessed in a previous study in 2,680 men  
30  
31 424 and women aged 30–74 years, though the lowest category in frequency of  
32  
33 425 laughter is different between that study (almost never) and current study  
34  
35 426 (<1 day/month). The Spearman correlation coefficient was found to be 0.61 ( $p$   
36  
37 427 < 0.001).<sup>42</sup> Forth, the use of self-reported questionnaires may have  
38  
39 428 introduced reporting bias regarding income and the frequency of laughter.  
40  
41 429 For example, some participants may not know or accurately remember their  
42  
43 430 income or their frequency of laughter. We consider these biases to represent  
44  
45 431 cases of non-differential misclassification, which would not be expected to be  
46  
47 432 dependent upon each other. However, this misclassification weakens the true  
48  
49 433 association, biasing the data towards the null hypothesis. Fifth, we did not  
50  
51  
52  
53  
54  
55  
56  
57  
58  
59  
60

1  
2  
3  
4  
5 434 take the diversity of types of laughter into account. There are many different  
6  
7 435 types of laughter (e.g., laughter related to joy, taunting, or tickling), each of  
8  
9 436 which are thought to play distinct roles in social cognition.<sup>43 44</sup> One study  
10  
11 437 reported three different types of laughter: “laughter of pleasure,” “laughter of  
12  
13 438 social obligation,” and “laughter as relief from tension”.<sup>45</sup> “Laughter of  
14  
15 439 pleasure” is an expression of pleasant emotions. “Laughter of social  
16  
17 440 obligation” occurs consciously, and is a way of communicating in interaction  
18  
19 441 with others. “Laughter as relief from tension” occurs when strain dissipates  
20  
21 442 or is removed. Further research is required to consider these differences in  
22  
23 443 laughter relative to equivalised income.  
24  
25  
26  
27  
28  
29

## 30 445 **CONCLUSION**

31  
32 446 In this study, we demonstrated a relationship between equivalised income  
33  
34 447 and the frequency of laughter. Additionally, we found an association between  
35  
36 448 frequency of laughter and factors relating to social relationships,  
37  
38 449 particularly family structure and frequency of meeting friends. We suggest  
39  
40 450 that people with higher incomes may experience improved health through a  
41  
42 451 higher frequency of laughter. Future research should examine  
43  
44 452 laughter-related health improvements among older people.  
45  
46  
47  
48  
49

## 50 454 51 52 455 **ACKNOWLEDGMENTS**

53  
54  
55 456 This study used data from the Japan Gerontological Evaluation Study  
56  
57  
58  
59  
60

1  
2  
3  
4  
5 457 (JAGES), conducted by the Nihon Fukushi University Center for Well-Being  
6  
7 458 and Society, for one of their research projects. We are extremely grateful to  
8  
9 459 study participants for the use of their personal data. We would like to  
10  
11 460 express our deepest gratitude to everyone who participated in the surveys.  
12  
13

14 461 This study was supported by Health Labour Sciences Research Grant,  
15  
16 462 Comprehensive Research on Aging and Health (H28-Choju-Ippan-002,  
17  
18 463 H26-Choju-Ippan-006, H25-Choju-Ippan-003, H25-Kenki-Wakate-015,  
19  
20 464 H25-Irryo-Shitei-003(Fukkou), H24-Junkanki(Syosyu)-Ippan-007) from the  
21  
22 465 Ministry of Health, Labour and Welfare, Japan; Grant-in-Aid for Scientific  
23  
24 466 Research (20319338, 22390400, 23243070, 23590786, 23790710, 24140701,  
25  
26 467 24390469, 24530698, 24653150, 24683018, 25253052, 25870573 2587881,  
27  
28 468 15H01972, 15KT0007) from the Japan Society for the Promotion of Science;  
29  
30 469 the Japan Agency for Medical Research and Development (16769793); and a  
31  
32 470 grant from the National Center for Geriatrics and Gerontology, Japan (24-17,  
33  
34 471 24-23, J09KF00804).  
35  
36  
37  
38

39 472

40 473

#### 41 474 **Conflict of Interest**

42  
43 475 This was not an industry supported study. The authors declare that they  
44  
45 476 have no conflicts of interest.  
46  
47

48 477

#### 49 478 **Authors' contributions**

50  
51 479 Yurika Imai, Masato Nagai and Tetsuya Ohira contributed to the design of  
52  
53  
54  
55  
56  
57  
58  
59  
60

1  
2  
3  
4  
5 480 the study. Naoki Kondo, Kokoro Shirai and Katsunori Kondo participated in  
6  
7 481 data collection. Yurika Imai and Masato Nagai participated in data analysis.  
8  
9 482 Yurika Imai, Masato Nagai and Tetsuya Ohira participated in writing the  
10  
11 483 report. All authors participated in critical revision of the manuscript and  
12  
13  
14 484 approved the final version of the report for submission.  
15

485

#### 486 **Ethical approval**

487 The JAGES protocol was reviewed and approved by the Ethics Committee on  
488 Research of Human Subjects at Nihon Fukushi University (Approval No.  
489 10-05). Written informed consent was assumed with voluntary return of the  
490 questionnaire.  
491

492

#### 492 **Data sharing**

493 No additional data are available.  
494  
495

#### 496 **REFERENCES**

- 497 1. Cabinet Office. The Status of Aging and Implementation of Measures for  
498 the Aging Society in FFY 2003. 2004. Available from:  
499 <http://www8.cao.go.jp/kourei/english/annualreport/2004/04wp-e.html>.  
500 Accessed 4 March 2016.
- 501 2. Cabinet Office. The State of Aging and Implementation of the Measures  
502 for an Aging Society in FY2015 2016 [Available from:

- 1  
2  
3  
4  
5 503 [http://www8.cao.go.jp/kourei/english/annualreport/2016/2016pdf\\_e.html](http://www8.cao.go.jp/kourei/english/annualreport/2016/2016pdf_e.html).  
6  
7 504 accessed Accessed 17 January 2018.  
8  
9 505 3. Shahidi M, Mojtahed A, Modabbernia A, et al. Laughter yoga versus group  
10  
11 506 exercise program in elderly depressed women: a randomized controlled  
12  
13 507 trial. *Int J Geriatr Psychiatry* 2011; 26: 322-327.  
14  
15  
16 508 4. Hasan H, Hasan TF. Laugh yourself into a healthier person: a cross  
17  
18 509 cultural analysis of the effects of varying levels of laughter on health. *Int J*  
19  
20 510 *Med Sci* 2009; 6: 200-211.  
21  
22  
23 511 5. Ko HJ, Youn CH. Effects of laughter therapy on depression, cognition and  
24  
25 512 sleep among the community-dwelling elderly. *Geriatr Gerontol Int* 2011;  
26  
27 513 11: 267-274.  
28  
29  
30 514 6. Sakai Y, Takayanagi K, Ohno M, et al. A trial of improvement of immunity  
31  
32 515 in cancer patients by laughter therapy. *Jpn Hosp* 2013: 53-59.  
33  
34 516 7. Kimata H. Laughter counteracts enhancement of plasma neurotrophin  
35  
36 517 levels and allergic skin wheal responses by mobile phone-mediated stress.  
37  
38 518 *Behav Med* 2004; 29: 149-152.  
39  
40  
41 519 8. Kimata H. Laughter elevates the levels of breast-milk melatonin. *J*  
42  
43 520 *Psychosom Res* 2007; 62: 699-702.  
44  
45  
46 521 9. Kimata H. Increase in dermcidin-derived peptides in sweat of patients  
47  
48 522 with atopic eczema caused by a humorous video. *J Psychosom Res* 2007;  
49  
50 523 62: 57-59.  
51  
52  
53 524 10. Penson RT, Partridge RA, Rudd P, et al. Laughter: the best medicine?  
54  
55 525 *Oncologist* 2005; 10: 651-660.  
56  
57  
58  
59  
60

- 1  
2  
3  
4  
5 526 11. Noji S, Takayanagi K. A case of laughter therapy that helped improve  
6  
7 527 advanced gastric cancer. *Jpn Hosp* 2010; 59-64.  
8  
9 528 12. Gelkopf M, Gonen B, Kurs R, et al. The effect of humorous movies on  
10  
11 529 inpatients with chronic schizophrenia. *J Nerv Ment Dis* 2006; 194:  
12  
13 530 880-883.  
14  
15 531 13. Takeda M, Hashimoto R, Kudo T, et al. Laughter and humor as  
16  
17 532 complementary and alternative medicines for dementia patients. *BMC*  
18  
19 533 *Complement Altern Med* 2010; 10: 28.  
20  
21 534 14. Hayashi K, Kawachi I, Ohira T, et al. Laughter is the Best Medicine? A  
22  
23 535 Cross-Sectional Study of Cardiovascular Disease Among Older Japanese  
24  
25 536 Adults. *J Epidemiol* 2016; 26: 546-552.  
26  
27 537 15. Goodenough B, Low LF, Casey AN, et al. Study protocol for a randomized  
28  
29 538 controlled trial of humor therapy in residential care: the Sydney Multisite  
30  
31 539 Intervention of LaughterBosses and ElderClowns (SMILE). *Int*  
32  
33 540 *Psychogeriatr* 2012; 24: 2037-2044.  
34  
35 541 16. Low LF, Goodenough B, Fletcher J, et al. The effects of humor therapy on  
36  
37 542 nursing home residents measured using observational methods: the  
38  
39 543 SMILE cluster randomized trial. *J Am Med Dir Assoc* 2014; 15: 564-569.  
40  
41 544 17. Low LF, Brodaty H, Goodenough B, et al. The Sydney Multisite  
42  
43 545 Intervention of LaughterBosses and ElderClowns (SMILE) study: cluster  
44  
45 546 randomised trial of humour therapy in nursing homes. *BMJ Open* 2013; 3;  
46  
47 547 e002072.  
48  
49 548 18. Provine RR. Laughter Punctuates Speech: Linguistic, Social and Gender  
50  
51  
52  
53  
54  
55  
56  
57  
58  
59  
60

- 1  
2  
3  
4  
5 549 Contexts of Laughter. *Etholog* 1993; 95: 291-298.  
6  
7 550 19. Weems S. Ha!: The Science of When We Laugh and Why. New York, NY:  
8  
9 551 Basic Books 2014.  
10  
11 552 20. Ahmed D, El Shair IH, Taher E, et al.. Prevalence and predictors of  
12  
13 553 depression and anxiety among the elderly population living in geriatric  
14  
15 554 homes in Cairo, Egypt. *J Egypt Public Health Assoc* 2014; 89: 127-135.  
16  
17  
18 555 21. Kahneman D, Deaton A. High income improves evaluation of life but not  
19  
20 556 emotional well-being. *Proc Natl Acad Sci U S A* 2010; 107: 16489-16493.  
21  
22  
23 557 22. Kondo K. Kenkokakusasyakai nanigakenkowomushibamunoka.  
24  
25 558 Igakusyoin; 2005 (in Japanese).  
26  
27 559 23. Smoski M, Bachorowskia JA. Antiphonal laughter between friends and  
28  
29 560 strangers. *Cognition and Emotion* 2010; 17: 327-340.  
30  
31  
32 561 24. Lim LL, Kua EH. Living alone, loneliness, and psychological well-being  
33  
34 562 of older persons in singapore. *Curr Gerontol Geriatr Res* 2011: 673181.  
35  
36  
37 563 25. Navarro J, del Moral R, Pedro C. Marijuán. Laughing bonds: A  
38  
39 564 multidisciplinary inquiry into the social information processes of human  
40  
41 565 laughter. *Kybernetes* 2016; 45: 1292-307.  
42  
43  
44 566 26. Hayashi K, Kawachi I, Ohira T, et al. Laughter and Subjective Health  
45  
46 567 Among Community-Dwelling Older People in Japan: Cross-Sectional  
47  
48 568 Analysis of the Japan Gerontological Evaluation Study Cohort Data. *J*  
49  
50 569 *Nerv Ment Dis* 2015; 203: 934-942.  
51  
52  
53 570 27. Koyano W, Shibata H, Nakazato K, et al.. Measurement of competence:  
54  
55 571 reliability and validity of the TMIG Index of Competence. *Arch Gerontol*  
56  
57  
58  
59  
60

- 1  
2  
3  
4  
5 572 *Geriatr* 1991; 13: 103-116.  
6  
7 573 28. Wada T, Ishine M, Kita T, et al. Depression screening of elderly  
8  
9 574 community-dwelling Japanese. *J Am Geriatr Soc* 2003; 51: 1328-1329.  
10  
11 575 29. Burke WJ, Roccaforte WH, Wengel SP. The short form of the Geriatric  
12  
13 576 Depression Scale: a comparison with the 30-item form. *J Geriatr*  
14  
15 577 *Psychiatry Neurol* 1991; 4: 173-178.  
16  
17 578 30. Murata C, Kondo K, Hirai H, et al. Association between depression and  
18  
19 579 socio-economic status among community-dwelling elderly in Japan: the  
20  
21 580 Aichi Gerontological Evaluation Study (AGES). *Health Place* 2007; 14:  
22  
23 581 406-414.  
24  
25 582 31. Schreiner AS, Hayakawa H, Morimoto T, et al. Screening for late life  
26  
27 583 depression: cut-off scores for the Geriatric Depression Scale and the  
28  
29 584 Cornell Scale for Depression in Dementia among Japanese subjects. *Int J*  
30  
31 585 *Geriatr Psychiatry* 2003; 18: 498-505.  
32  
33 586 32. Spiegelman D, Hertzmark E. Easy SAS calculations for risk or  
34  
35 587 prevalence ratios and differences. *Am J Epidemiol* 2005; 162: 199-200.  
36  
37 588 33. Navarro J, del Moral R, Alonso MF, et al. Validation of laughter for  
38  
39 589 diagnosis and evaluation of depression. *J Affect Disord* 2014; 160: 43-49.  
40  
41 590 34. Quesnel-Vallee A, Taylor M. Socioeconomic pathways to depressive  
42  
43 591 symptoms in adulthood: evidence from the National Longitudinal Survey  
44  
45 592 of Youth 1979. *Soc Sci Med* 2012; 74: 734-743.  
46  
47 593 35. Oda T. Some Considerations about Friendship of Elderly Japanese Living  
48  
49 594 in an Urban Area. *Bulletin of Graduate School of Human Development*  
50  
51  
52  
53  
54  
55  
56  
57  
58  
59  
60



- 1  
2  
3  
4  
5 595 *and Environment, Kobe University* 2003; 10: 491-502 (in Japanese).  
6  
7  
8 596 36. Okabayashi H, Hougham GW. Gender differences of social interactions  
9  
10 597 and their effects on subjective well-being among Japanese elders. *Aging*  
11  
12 598 *Ment Health* 2014; 18: 59-71.  
13  
14 599 37. Litwin H, Shiovitz-Ezra S. Social network type and subjective well-being  
15  
16 600 in a national sample of older Americans. *Gerontologist* 2011; 51: 379-388.  
17  
18 601 38. Saito M, Kondo N, Kondo K, et al. Gender differences on the impacts of  
19  
20 602 social exclusion on mortality among older Japanese: AGES cohort study.  
21  
22 603 *Soc Sci Med* 2012; 75: 940-945.  
23  
24  
25 604 39. Larson R. Thirty years of research on the subjective well-being of older  
26  
27 605 americans. *J Gerontol* 1978; 33: 109-125.  
28  
29  
30 606 40. House JS. Social Support and Social Structure. *Sociological Forum* 1987;  
31  
32 607 2: 135-146.  
33  
34 608 41. Kashiwagi K, Hirayama J. Marital norm, reality and satisfaction in  
35  
36 609 middle-aged couples: why are wives less satisfied than husbands?.  
37  
38 610 *Shinrigaku Kenkyu* 2003; 74: 122-130 (in Japanese).  
39  
40  
41 611 42. Hirosaki M, Ohira T, Yasumura S, et al. Lifestyle factors and social ties  
42  
43 612 associated with the frequency of laughter after the Great East Japan  
44  
45 613 Earthquake: Fukushima Health Management Survey. *Qual Life Res* 2017;  
46  
47 614 Epub ahead of print.  
48  
49  
50 615 43. Wildgruber D, Szameitat DP, Ethofer T, et al. Different types of laughter  
51  
52 616 modulate connectivity within distinct parts of the laughter perception  
53  
54 617 network. *PLoS One* 2013; 8: e63441.  
55  
56  
57  
58  
59  
60

- 1  
2  
3  
4  
5 618 44. Szameitat DP, Kreifelts B, Alter K, et al. It is not always tickling: distinct  
6  
7 619 cerebral responses during perception of different laughter types.  
8  
9 620 *Neuroimage* 2010; 53: 1264-1271.  
10  
11 621 45. Shimizu A. Laughter, the brain, and psychiatric diseases. *Seishin*  
12  
13 *Shinkeigaku Zasshi* 2001; 103: 895-903 (in Japanese).  
14  
15 622

623

624

625 **Figure legend**

626 Figure 1. Adjusted prevalence ratios (PRs) for laughing almost every day  
627 in each group according to equivalised income and frequency of meeting  
628 friends in men (a) and women (b) were calculated using binomial  
629 regression analysis. PRs were adjusted for age (5-year category),  
630 instrumental activities of daily living (IADL; independent, not  
631 independent, missing), and depression (no depression, depression,  
632 missing). The lowest equivalised income and meeting friends less  
633 frequently category was set as the reference category.

634

635 Figure 2. Adjusted prevalence ratios (PRs) for laughing almost every day  
636 in each group according to equivalised income and the number of social  
637 groups in men (a) and women (b) were calculated using binomial  
638 regression analysis. PRs were adjusted for age (5-year category),  
639 instrumental activities of daily living (IADL; independent, not  
640 independent, missing), and depression (no depression, depression,

1  
2  
3  
4  
5 641 missing). The lowest equivalised income and non-participation in social  
6  
7 642 group category was set as the reference category.  
8  
9

10 643

11  
12 644 Figure 3. Adjusted prevalence ratios (PRs) for laughing almost every day in  
13  
14 645 each group according to equivalised income and family structure in men (a)  
15  
16 646 and women (b) were calculated using binomial regression analysis. PRs were  
17  
18 647 adjusted for age (5-year category), instrumental activities of daily living  
19  
20 648 (IADL; independent, not independent, missing), and depression (no  
21  
22 649 depression, depression, missing). The lowest equivalised income and living  
23  
24 650 alone category was set as the reference category.  
25  
26

27  
28 651  
29  
30  
31  
32  
33  
34  
35  
36  
37  
38  
39  
40  
41  
42  
43  
44  
45  
46  
47  
48  
49  
50  
51  
52  
53  
54  
55  
56  
57  
58  
59  
60

1  
2  
3  
4  
5  
6  
7  
8  
9  
10  
11  
12  
13  
14  
15  
16  
17  
18  
19  
20  
21  
22  
23  
24  
25  
26  
27  
28  
29  
30  
31  
32  
33  
34  
35  
36  
37  
38  
39  
40  
41  
42  
43  
44  
45  
46  
47  
48  
49  
50  
51  
52  
53  
54  
55  
56  
57  
58  
59  
60

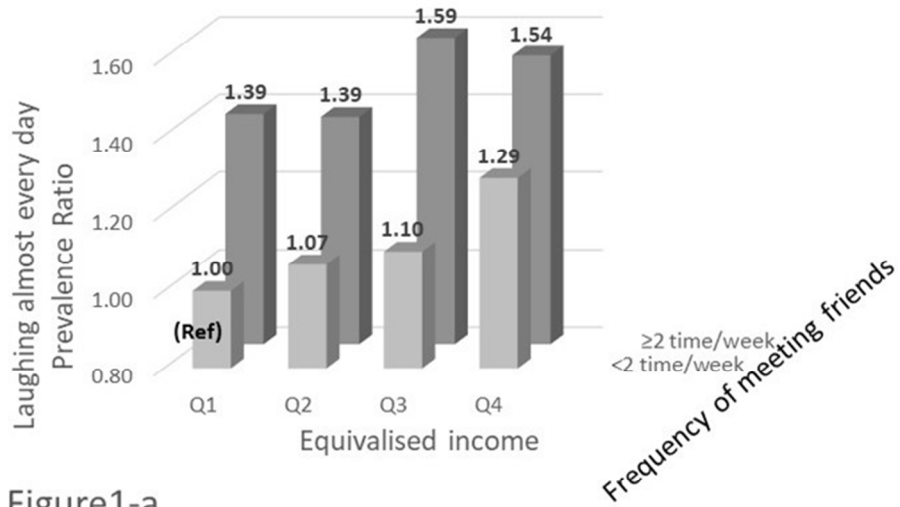

Figure1-a

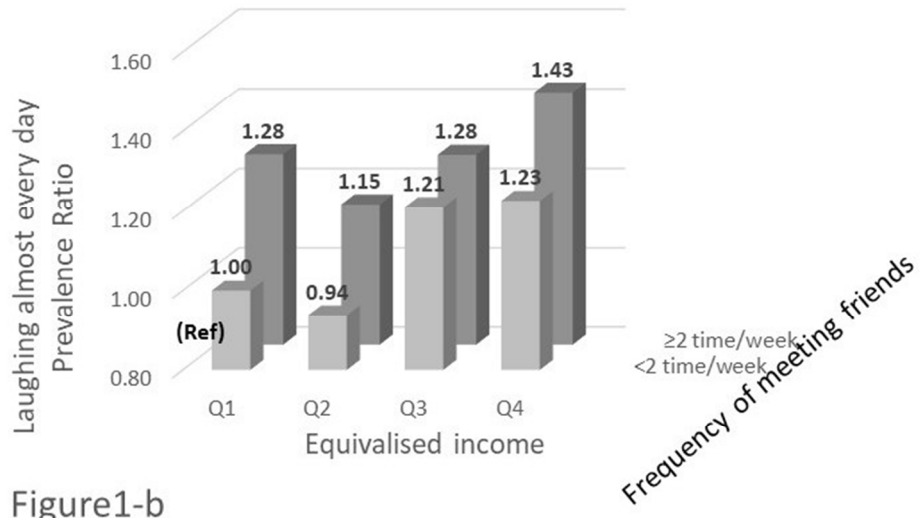

Figure1-b

62x75mm (300 x 300 DPI)

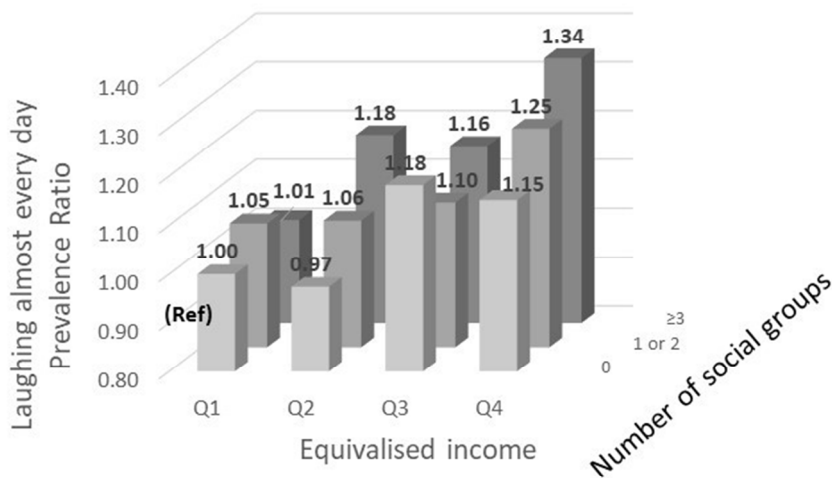

Figure2-a

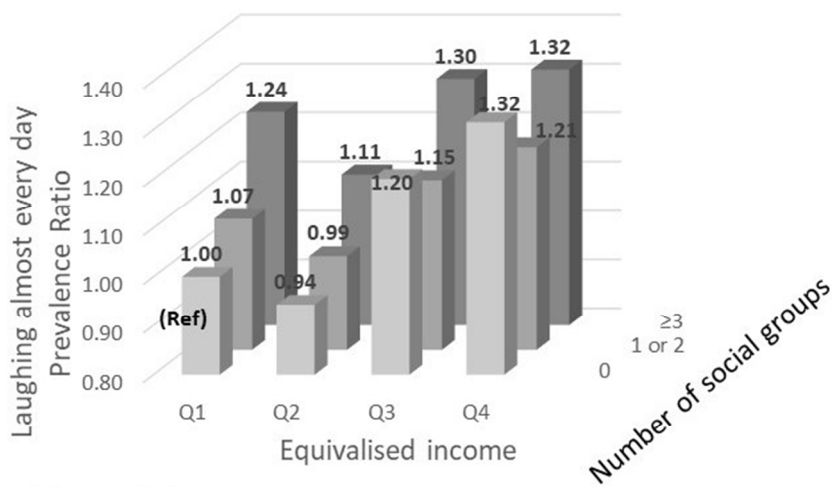

Figure2-b

60x76mm (300 x 300 DPI)

1  
2  
3  
4  
5  
6  
7  
8  
9  
10  
11  
12  
13  
14  
15  
16  
17  
18  
19  
20  
21  
22  
23  
24  
25  
26  
27  
28  
29  
30  
31  
32  
33  
34  
35  
36  
37  
38  
39  
40  
41  
42  
43  
44  
45  
46  
47  
48  
49  
50  
51  
52  
53  
54  
55  
56  
57  
58  
59  
60

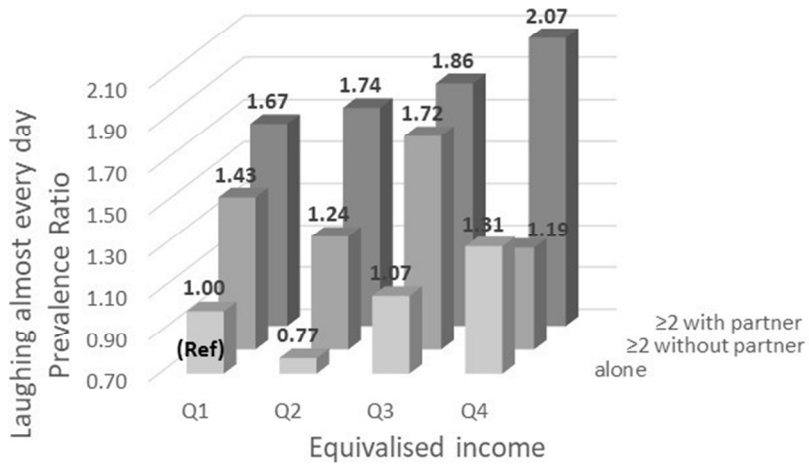

Figure3-a

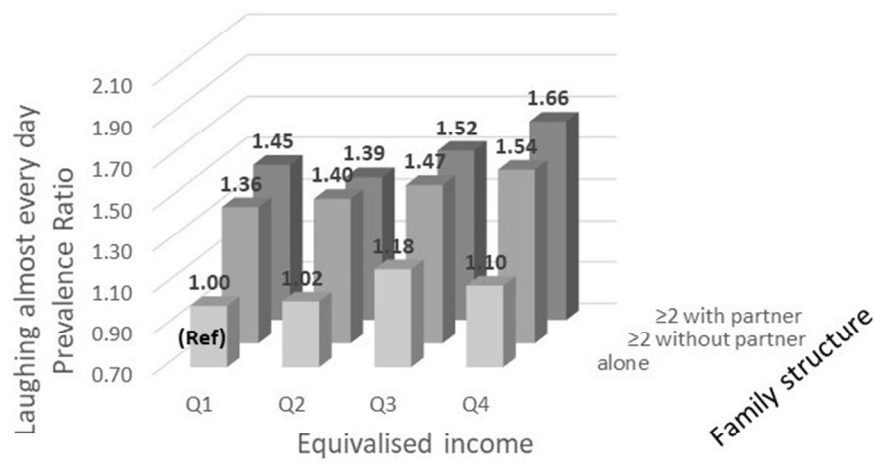

Figure3-b

63x76mm (300 x 300 DPI)

**STROBE 2007 (v4) Statement—Checklist of items that should be included in reports of *cross-sectional studies***

| Section/Topic                | Item # | Recommendation                                                                                                                                                                       | Reported on page # |
|------------------------------|--------|--------------------------------------------------------------------------------------------------------------------------------------------------------------------------------------|--------------------|
| Title and abstract           | 1      | (a) Indicate the study's design with a commonly used term in the title or the abstract                                                                                               | 1                  |
|                              |        | (b) Provide in the abstract an informative and balanced summary of what was done and what was found                                                                                  | 4                  |
| <b>Introduction</b>          |        |                                                                                                                                                                                      |                    |
| Background/rationale         | 2      | Explain the scientific background and rationale for the investigation being reported                                                                                                 | 5-6                |
| Objectives                   | 3      | State specific objectives, including any prespecified hypotheses                                                                                                                     | 6                  |
| <b>Methods</b>               |        |                                                                                                                                                                                      |                    |
| Study design                 | 4      | Present key elements of study design early in the paper                                                                                                                              | 6                  |
| Setting                      | 5      | Describe the setting, locations, and relevant dates, including periods of recruitment, exposure, follow-up, and data collection                                                      | 7-8                |
| Participants                 | 6      | (a) Give the eligibility criteria, and the sources and methods of selection of participants                                                                                          | 7                  |
| Variables                    | 7      | Clearly define all outcomes, exposures, predictors, potential confounders, and effect modifiers. Give diagnostic criteria, if applicable                                             | 8                  |
| Data sources/<br>measurement | 8*     | For each variable of interest, give sources of data and details of methods of assessment (measurement). Describe comparability of assessment methods if there is more than one group | 8                  |
| Bias                         | 9      | Describe any efforts to address potential sources of bias                                                                                                                            | 10-11              |
| Study size                   | 10     | Explain how the study size was arrived at                                                                                                                                            | 10-11              |
| Quantitative variables       | 11     | Explain how quantitative variables were handled in the analyses. If applicable, describe which groupings were chosen and why                                                         | 10-11              |
| Statistical methods          | 12     | (a) Describe all statistical methods, including those used to control for confounding                                                                                                | 8-9                |
|                              |        | (b) Describe any methods used to examine subgroups and interactions                                                                                                                  | 10-11              |
|                              |        | (c) Explain how missing data were addressed                                                                                                                                          | 10                 |
|                              |        | (d) If applicable, describe analytical methods taking account of sampling strategy                                                                                                   |                    |
|                              |        | (e) Describe any sensitivity analyses                                                                                                                                                | 10                 |
| <b>Results</b>               |        |                                                                                                                                                                                      |                    |

|                          |     |                                                                                                                                                                                                              |       |
|--------------------------|-----|--------------------------------------------------------------------------------------------------------------------------------------------------------------------------------------------------------------|-------|
| Participants             | 13* | (a) Report numbers of individuals at each stage of study—eg numbers potentially eligible, examined for eligibility, confirmed eligible, included in the study, completing follow-up, and analysed            | 7     |
|                          |     | (b) Give reasons for non-participation at each stage                                                                                                                                                         | 7     |
|                          |     | (c) Consider use of a flow diagram                                                                                                                                                                           |       |
| Descriptive data         | 14* | (a) Give characteristics of study participants (eg demographic, clinical, social) and information on exposures and potential confounders                                                                     | 7-11  |
|                          |     | (b) Indicate number of participants with missing data for each variable of interest                                                                                                                          | 12-13 |
| Outcome data             | 15* | Report numbers of outcome events or summary measures                                                                                                                                                         | 12-13 |
| Main results             | 16  | (a) Give unadjusted estimates and, if applicable, confounder-adjusted estimates and their precision (eg, 95% confidence interval). Make clear which confounders were adjusted for and why they were included | 15    |
|                          |     | (b) Report category boundaries when continuous variables were categorized                                                                                                                                    | 8     |
|                          |     | (c) If relevant, consider translating estimates of relative risk into absolute risk for a meaningful time period                                                                                             |       |
| Other analyses           | 17  | Report other analyses done—eg analyses of subgroups and interactions, and sensitivity analyses                                                                                                               | 17-19 |
| <b>Discussion</b>        |     |                                                                                                                                                                                                              |       |
| Key results              | 18  | Summarise key results with reference to study objectives                                                                                                                                                     | 19    |
| Limitations              | 19  | Discuss limitations of the study, taking into account sources of potential bias or imprecision. Discuss both direction and magnitude of any potential bias                                                   | 22-23 |
| Interpretation           | 20  | Give a cautious overall interpretation of results considering objectives, limitations, multiplicity of analyses, results from similar studies, and other relevant evidence                                   | 19-22 |
| Generalisability         | 21  | Discuss the generalisability (external validity) of the study results                                                                                                                                        |       |
| <b>Other information</b> |     |                                                                                                                                                                                                              |       |
| Funding                  | 22  | Give the source of funding and the role of the funders for the present study and, if applicable, for the original study on which the present article is based                                                | 24    |

\*Give information separately for cases and controls in case-control studies and, if applicable, for exposed and unexposed groups in cohort and cross-sectional studies.

**Note:** An Explanation and Elaboration article discusses each checklist item and gives methodological background and published examples of transparent reporting. The STROBE checklist is best used in conjunction with this article (freely available on the Web sites of PLoS Medicine at <http://www.plosmedicine.org/>, Annals of Internal Medicine at <http://www.annals.org/>, and Epidemiology at <http://www.epidem.com/>). Information on the STROBE Initiative is available at [www.strobe-statement.org](http://www.strobe-statement.org).
